# Supplementary material for: Expanding the donor–acceptor toolbox with a minimal 5-(thiophen-2-yl)-1,3-thiazole core: transition metal-free synthesis and molecular design for HOMO–LUMO energy modulations
Source: Royal Society of Chemistry journal article supplement (doi:10.1039/c6nj00418k), 2016-01-01
Supplement: c6nj00418k1.pdf [file c6nj00418k1.pdf]

## Electronic Supplementary Information (ESI) for

### Expanding Donor-Acceptor toolbox with a minimal 5-(thiophen-2-yl)-1,3-thiazole core: Transition metal-free synthesis and molecular design for HOMO-LUMO energy modulations

Rakesh Radhakrishnan and Kumaran G. Sreejalekshmi\*

Department of Chemistry, Indian Institute of Space Science and Technology, Valiamala Post,  
Thiruvananthapuram – 695 547

E-mail: [sreeja@iist.ac.in](mailto:sreeja@iist.ac.in)

#### Table of Contents

|                                                   |     |
|---------------------------------------------------|-----|
| Experimental Section                              | S2  |
| Characterization Data                             | S3  |
| NMR Spectra                                       | S5  |
| Computational Details                             | S13 |
| Coordinates of the Compounds (Optimized Geometry) | S15 |
| References                                        | S56 |

## EXPERIMENTAL SECTION

### General Information:

Commercially available reagents were used without further purification. NMR spectra were recorded using Bruker AV III 500 MHz FTNMR spectrometer using CDCl<sub>3</sub> as solvent and TMS as internal standard. Mass spectra were recorded under ESI/HRMS using Thermoscientific Exactive mass spectrometer. Melting points were determined using DSC (DSC Q20, TA Instruments). TLC was performed using silica gel 60 F254 (Merck) plates and fluorescence was visualized using UV lamp of wavelength 365nm. Column chromatography was performed using 60-120 mesh silica gel.

### General procedure for the syntheses of aroylthioureas

Aroylthioureas **3a-h** were prepared by the following procedure. Aroyl chloride was added slowly to a solution of KSCN (10 mmol) in acetone, refluxed for 30 min and then cooled to room temperature. A solution of secondary amine in acetone was then added slowly and stirred for 2 h. The reaction mixture was added to crushed ice, precipitated product was filtered, dried and recrystallized from appropriate solvents.

### General procedure for the syntheses of thienylthiazole **5a-h**

To a solution of 2-bromomethyl-5-nitrothiophene **4** (1mmol) in DMF (2mL), thiourea (1mmol) was added followed by triethylamine (1.2 mmol) and stirred for 30-45 min. The reaction mixture was then added slowly to crushed ice with vigorous stirring. The precipitated compound was filtered and dried. (Alternatively, extraction with DCM followed by evaporation of the solvent can be performed). The residue was subjected to silica gel column chromatography (petroleum ether-ethyl acetate, 100:1) to yield the product as red solid.

N, N-dimethyl-5-(5-nitrothiophen-2-yl)-4-phenylthiazol-2-amine (**5a**)

Yield: 202 mg (61%). Red solid, m.p. 160.8 °C. <sup>1</sup>H NMR (500 MHz, CDCl<sub>3</sub>, ppm): δ= 7.61(d, *J*=4.5 Hz, 1H), 7.45-7.4 (m, 2H), 7.35-7.36 (m, 3H), 6.60 (d, *J*=4.5 Hz, 1H), 3.11 (s, 6H); <sup>13</sup>C NMR (125 MHz, CDCl<sub>3</sub>, ppm): δ=168.0, 152.1, 147.1, 143.1, 133.6, 128.3, 128.2, 128.1, 128.0, 122.4, 111.6, 39.1; HRMS (ESI) calc. C<sub>15</sub>H<sub>14</sub>N<sub>3</sub>O<sub>2</sub>S<sub>2</sub> [M+H]<sup>+</sup>: 332.0524, found: 332.0528.

4-(4-bromophenyl)-N,N-dimethyl-5-(5-nitrothiophen-2-yl)thiazol-2-amine (**5b**)

Yield: 245 mg (60%). Red solid, m.p. 163.5°C. <sup>1</sup>H NMR (500 MHz, CDCl<sub>3</sub>, ppm): δ=7.64 (d, *J*= 4.5 Hz, 1H), 7.47-7.48 (m, 2H), 7.35 -7.36 (m, 2H), 6.63 (d, *J*=4.5 Hz, 1H), 3.10 (s, 6H); <sup>13</sup>C NMR (125 MHz, CDCl<sub>3</sub>, ppm): δ=168.0, 150.4, 147.5, 142.5, 132.4, 131.0, 129.8, 128.3, 122.9, 122.5, 111.5, 39.1; HRMS (ESI) calc. C<sub>15</sub>H<sub>13</sub>BrN<sub>3</sub>O<sub>2</sub>S<sub>2</sub>. [M+H]<sup>+</sup>: 409.9629, found: 409.9641.

N,N-dimethyl-5-(5-nitrothiophen-2-yl)-4-(p-tolyl)thiazol-2-amine (**5c**)

Yield: 217 mg (63%). Red solid, m.p. 148.3 °C. <sup>1</sup>H NMR (500 MHz, CDCl<sub>3</sub>, ppm): δ=7.62 (d, *J*=4.5 Hz, 1H), 7.34-7.35 (m, 2H), 7.15-7.19 (m, 2H), 6.61 (d, *J*=4.4 Hz, 1H), 3.10 (s, 6H), 2.33 (s, 3H); <sup>13</sup>C NMR (125 MHz, CDCl<sub>3</sub>, ppm): δ=167.9, 152.4, 146.9, 143.5, 139.0, 138.4, 130.5, 128.7, 128.3, 127.9, 122.2, 39.1, 21.6; HRMS (ESI) calc. C<sub>16</sub>H<sub>16</sub>N<sub>3</sub>O<sub>2</sub>S<sub>2</sub>. [M+H]<sup>+</sup>: 346.0680, found: 346.0683.

N,N-diethyl-5-(5-nitrothiophen-2-yl)-4-phenylthiazol-2-amine (**5d**)

Yield: 215 mg (60%). Red waxy solid. <sup>1</sup>H NMR (500 MHz, CDCl<sub>3</sub>, ppm): δ=7.61 (d, *J*=4.5 Hz, 1H), 7.45-7.47 (m, 2H), 7.34-7.36 (m, 3H), 6.58 (d, *J*=4.5 Hz, 1H), 3.45-3.50(m, 4H), 1.20-1.23 (m, 6H); <sup>13</sup>C NMR (125 MHz, CDCl<sub>3</sub>, ppm): δ=166.6, 152, 147.5, 143.5, 133.7, 128.3, 128.3, 128.1, 127.9, 122.2, 110.6, 44.6, 11.6; HRMS (ESI) calc. C<sub>17</sub>H<sub>18</sub>O<sub>2</sub>N<sub>3</sub>S<sub>2</sub>. [M+H]<sup>+</sup>: 360.0836, found: 360.0842.

N,N-diethyl-5-(5-nitrothiophen-2-yl)-4-(p-tolyl)thiazol-2-amine (**5e**)

Yield: 238 mg (64%). waxy Red solid.  $^1\text{H}$  NMR (500 MHz,  $\text{CDCl}_3$ , ppm):  $\delta$ =7.61 (d,  $J$ =4.5 Hz, 1H), 7.34-7.36 (m, 2H), 7.15-7.19 (m, 2H), 6.57 (d,  $J$ =4.5 Hz, 1H), 3.45-3.49 (m, 4H), 2.33 (s, 3H), 1.19-1.22 (m, 6H);  $^{13}\text{C}$  NMR (125 MHz,  $\text{CDCl}_3$ , ppm):  $\delta$ =166.8, 152.4, 146.5, 143.7, 138.3, 128.6, 128.3, 128.0, 127.8, 122.0, 99.0, 44.6, 20.5, 11.6; HRMS (ESI) calc.  $\text{C}_{18}\text{H}_{20}\text{O}_2\text{N}_3\text{S}_2$ .  $[\text{M}+\text{H}]^+$ : 374.0992, found: 374.0999.

5-(5-nitrothiophen-2-yl)-4-phenyl-2-(piperidin-1-yl)thiazole (**5f**)

Yield: 241 mg (65%). Red solid, m.p. 177.8 °C.  $^1\text{H}$  NMR (500 MHz,  $\text{CDCl}_3$ , ppm):  $\delta$ =7.61 (d,  $J$ =4.5 Hz, 1H), 7.44-7.46 (m, 2H), 7.34-7.36 (m, 3H), 6.59 (d,  $J$ =4.5 Hz, 1H), 3.47-3.48 (m, 4H), 1.57-1.71 (m, 6H);  $^{13}\text{C}$  NMR (125 MHz,  $\text{CDCl}_3$ , ppm):  $\delta$ =168.1, 151.9, 147.1, 143.2, 133.6, 128.3, 128.3, 128.1, 127.9, 122.4, 111.2, 48.5, 24.1, 23.0; HRMS (ESI) calc.  $\text{C}_{18}\text{H}_{18}\text{O}_2\text{N}_3\text{S}_2$ .  $[\text{M}+\text{H}]^+$ : 372.0836, found: 372.0838.

5-(5-nitrothiophen-2-yl)-2-(piperidin-1-yl)-4-(p-tolyl)thiazole (**5g**)

Yield: 223 mg (58%). Red solid, m.p. 119 °C.  $^1\text{H}$  NMR (500 MHz,  $\text{CDCl}_3$ , ppm):  $\delta$ =7.67 (d,  $J$ =4.5 Hz, 1H), 7.40-7.42 (m, 2H), 7.22-7.26 (m, 2H), 6.67 (d,  $J$ =4.5 Hz, 1H), 3.54-3.55 (m, 4H), 2.40 (s, 3H), 1.69-1.73 (m, 6H);  $^{13}\text{C}$  NMR (125 MHz,  $\text{CDCl}_3$ , ppm):  $\delta$ =169.0, 153.2, 147.6, 144.6, 139.4, 131.6, 129.7, 129.3, 129.0, 123.3, 112.0, 49.5, 25.2, 24.00, 21.5; HRMS (ESI) calc.  $\text{C}_{19}\text{H}_{20}\text{O}_2\text{N}_3\text{S}_2$ .  $[\text{M}+\text{H}]^+$ : 386.0992, found: 386.0993.

4-(furan-2-yl)-5-(5-nitrothiophen-2-yl)-N,N-diphenylthiazol-2-amine (**5h**)

Yield: 227 mg (51%). Red solid, m.p. 154.5 °C.  $^1\text{H}$  NMR (500 MHz,  $\text{CDCl}_3$ , ppm):  $\delta$ =7.71 (d,  $J$ =4.5 Hz, 1H), 7.33-7.40 (m, 10H), 7.21-7.24 (m, 1H), 6.97 (d,  $J$ =4.5 Hz, 1H), 6.74 (d,  $J$ =3.5 Hz, 1H), 6.42-6.43 (m, 1H);  $^{13}\text{C}$  NMR (125 MHz,  $\text{CDCl}_3$ , ppm):  $\delta$ =167.4, 149.0, 144.1, 142.8, 141.7, 140.2, 129.8, 128.8, 126.8, 126.3, 126.0, 114.1, 111.9, 111.8; HRMS (ESI) calc.  $\text{C}_{23}\text{H}_{16}\text{O}_3\text{N}_3\text{S}_2$ .  $[\text{M}+\text{H}]^+$ : 446.0629, found: 446.0630

## NMR Spectra of **5a-h**

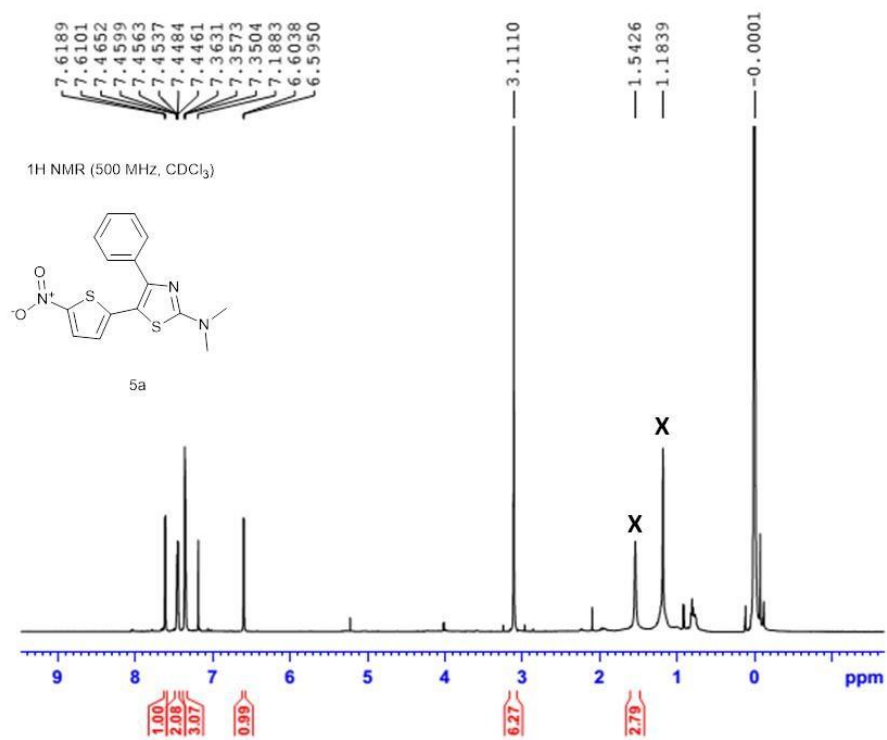

<sup>1</sup>H NMR spectrum of **5a**

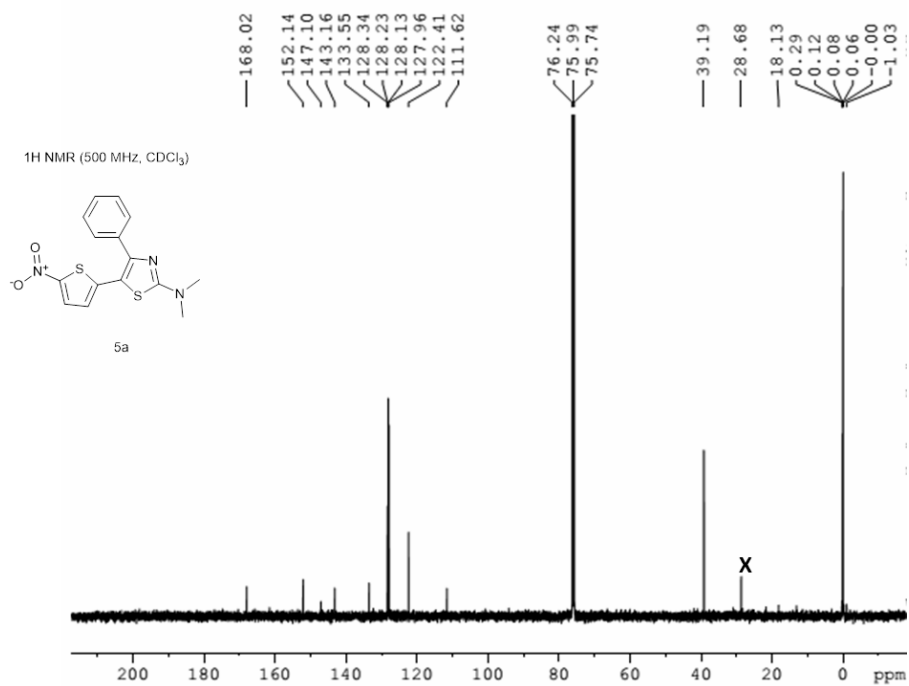

<sup>13</sup>C NMR spectrum of **5a**

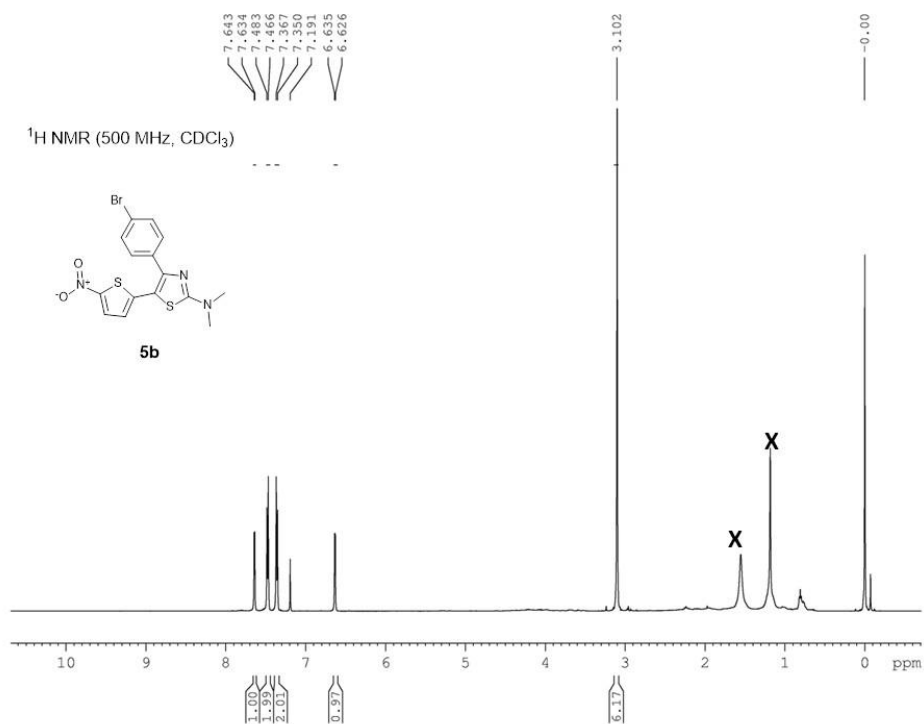

<sup>1</sup>H NMR spectrum of **5b**

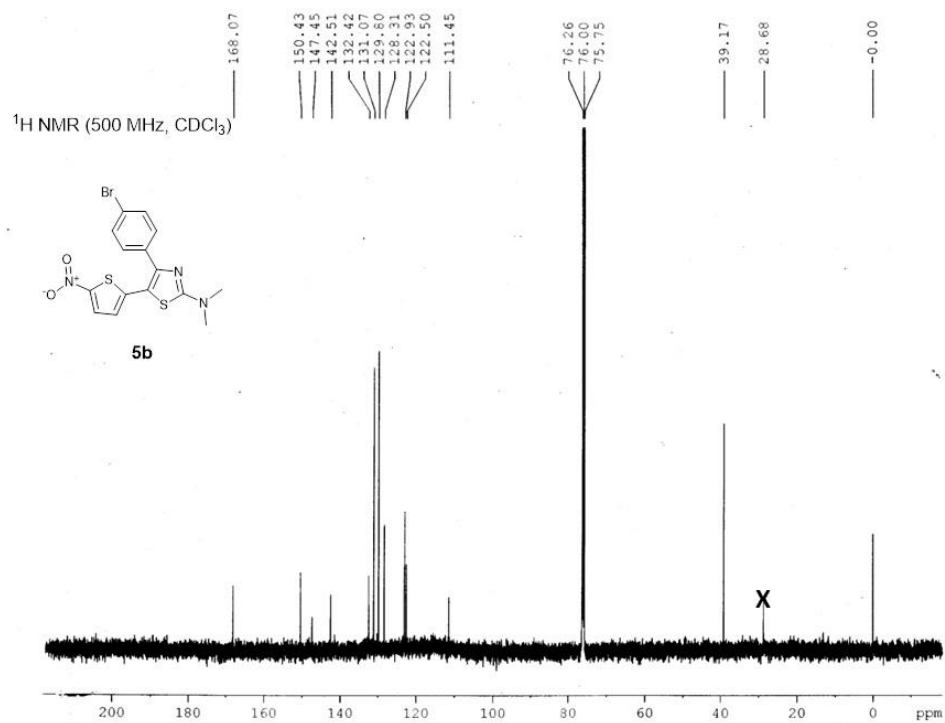

<sup>13</sup>C NMR spectrum of **5b**

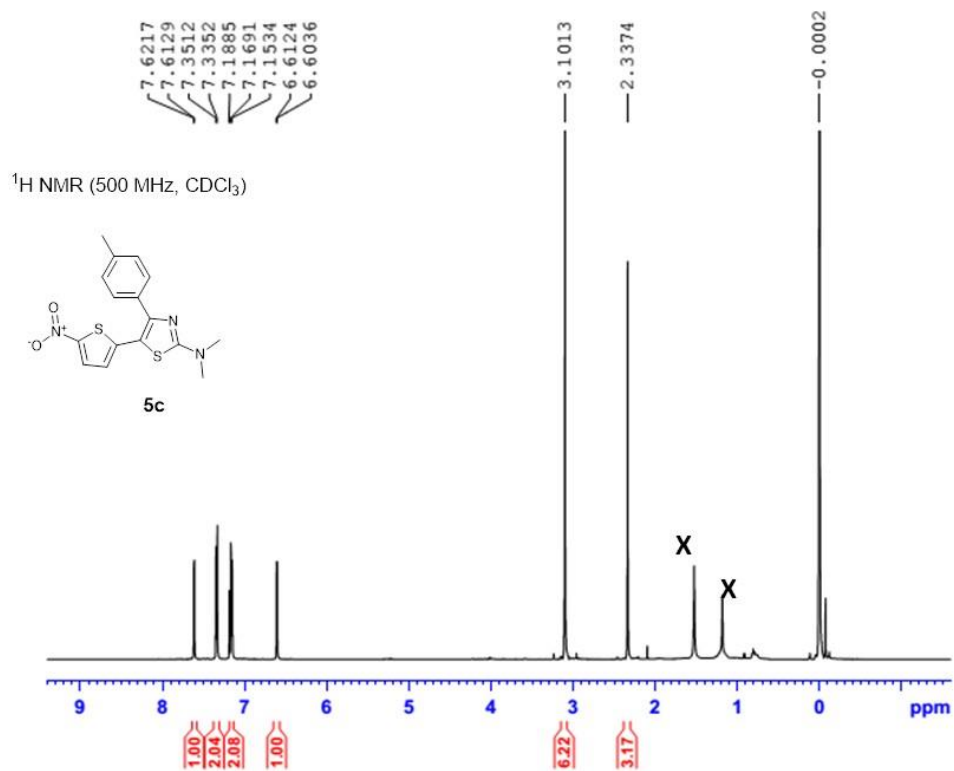

<sup>1</sup>H NMR spectrum of **5c**

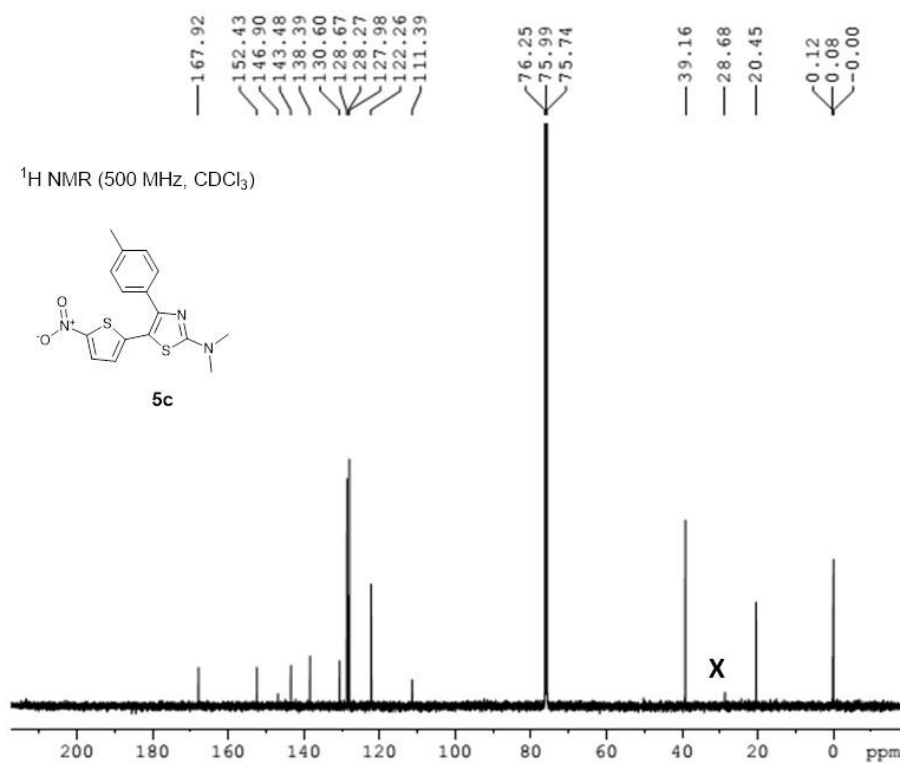

<sup>13</sup>C NMR spectrum of **5c**

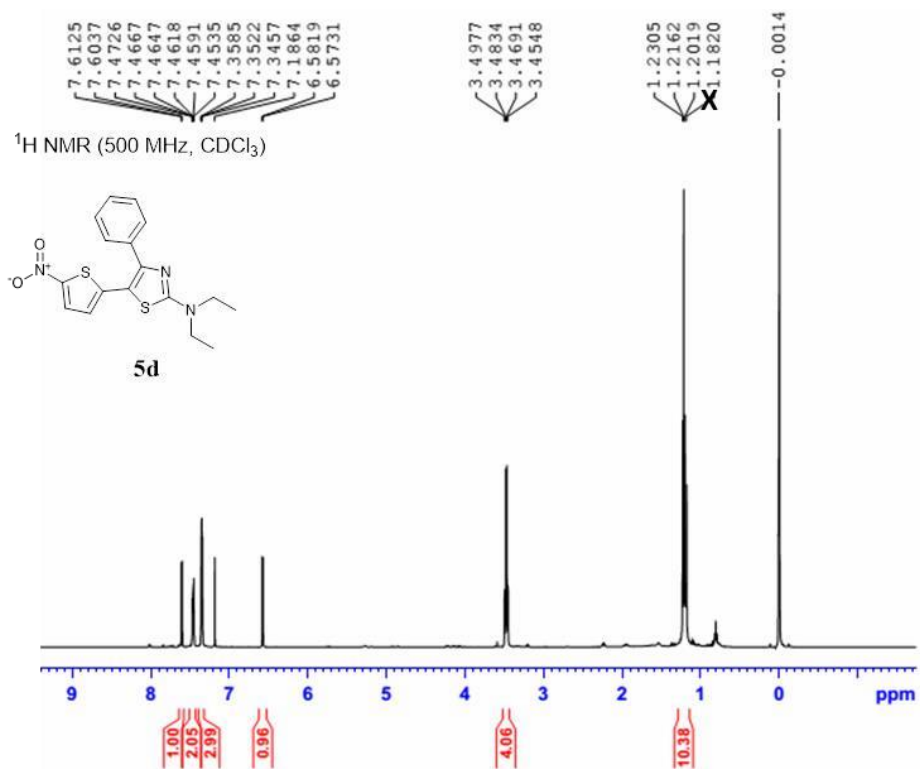

<sup>1</sup>H NMR spectrum of **5d**

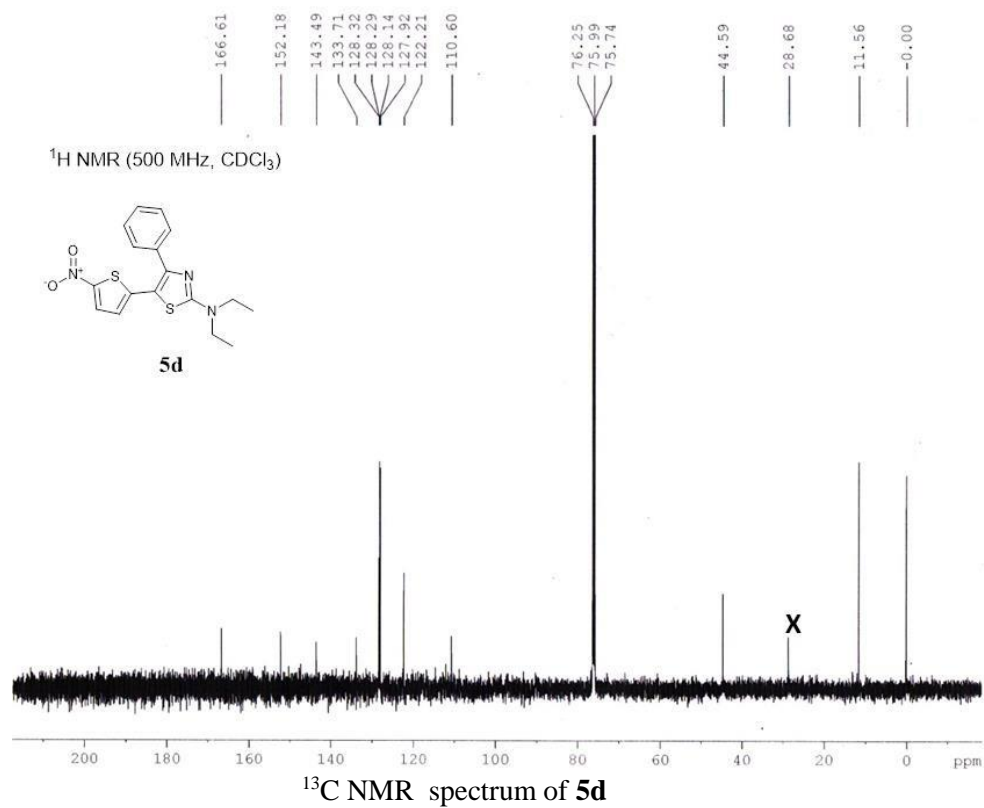

<sup>13</sup>C NMR spectrum of **5d**

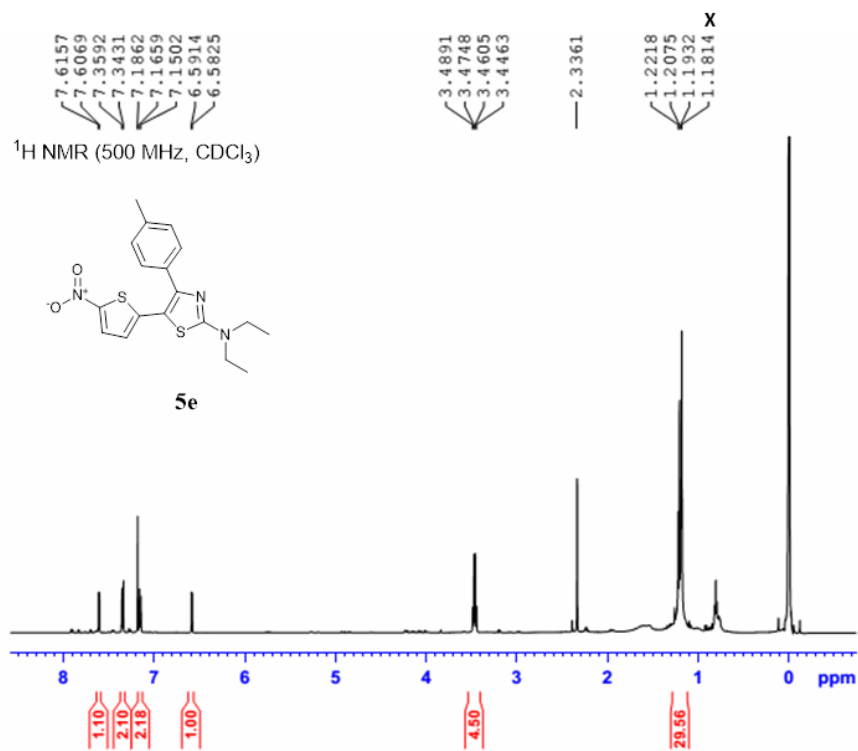

<sup>1</sup>H NMR spectrum of **5e**

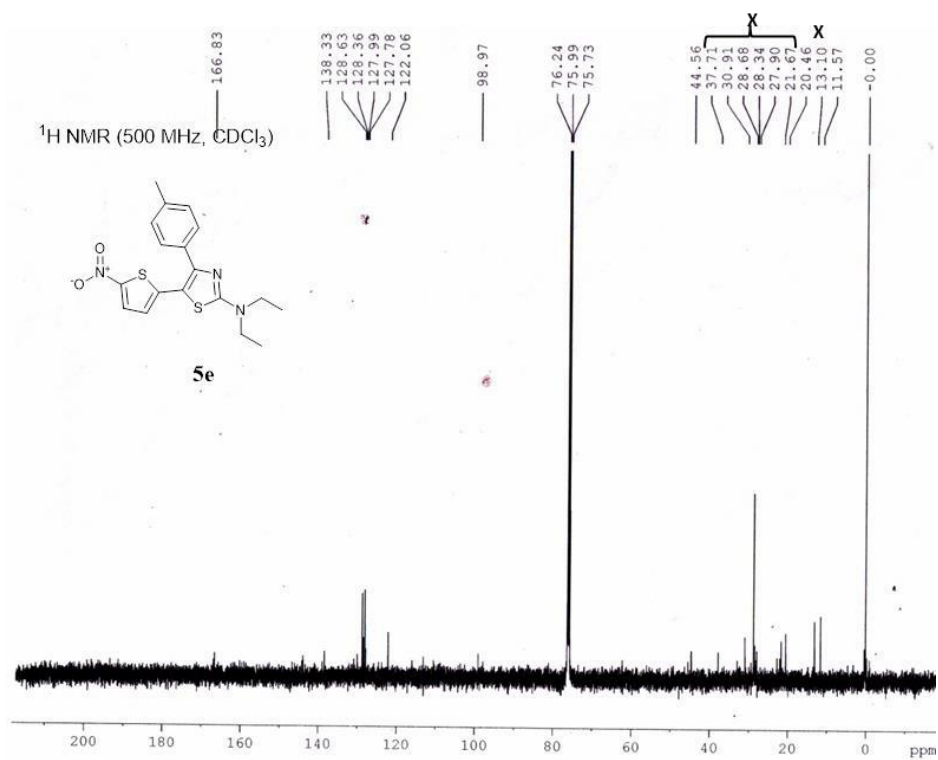

<sup>13</sup>C NMR spectrum of **5e**

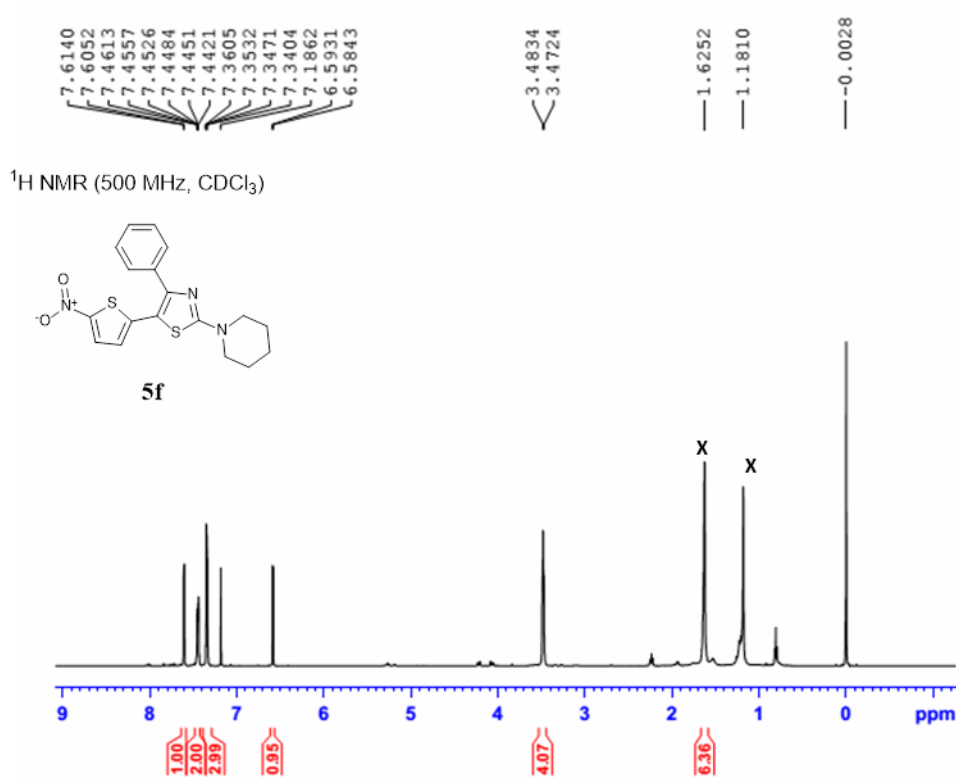

<sup>1</sup>H NMR spectrum of **5f**

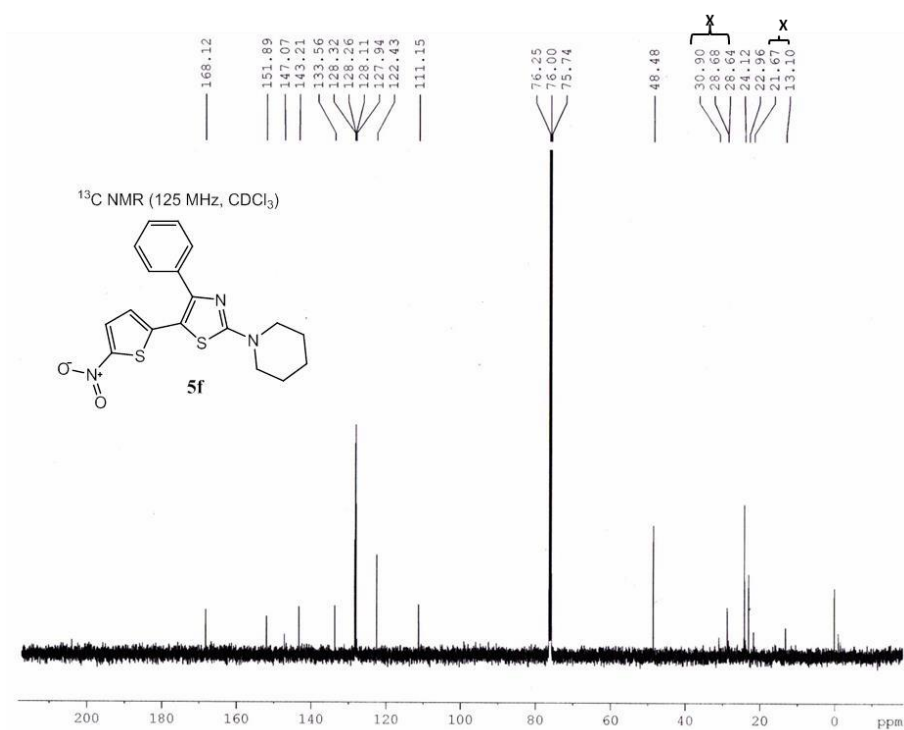

<sup>13</sup>C NMR spectrum of **5f**

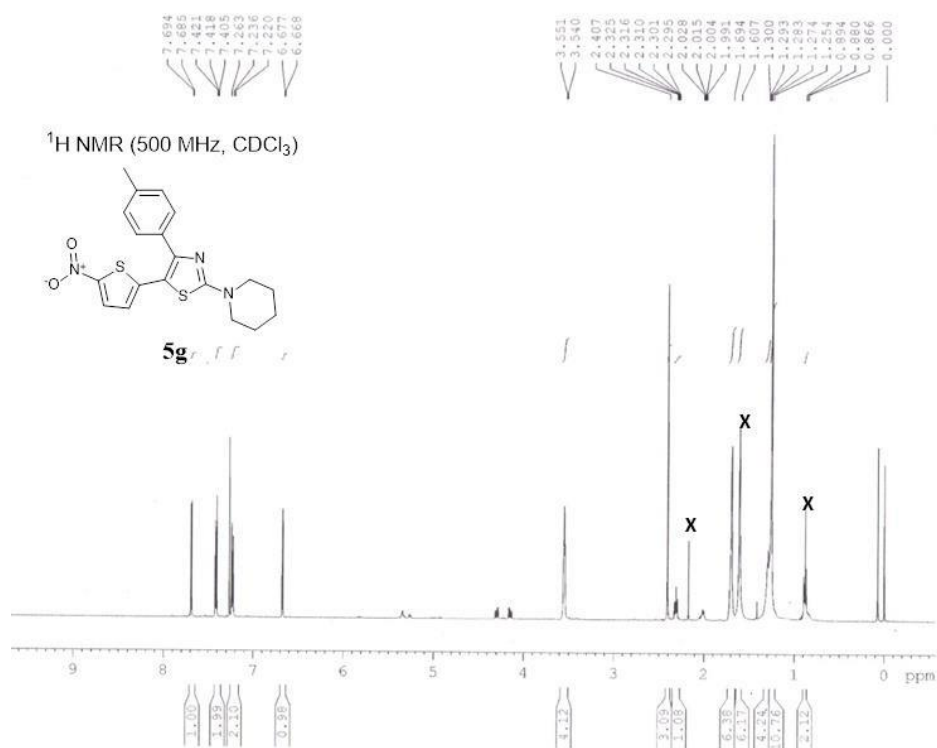

<sup>1</sup>H NMR spectrum of **5g**

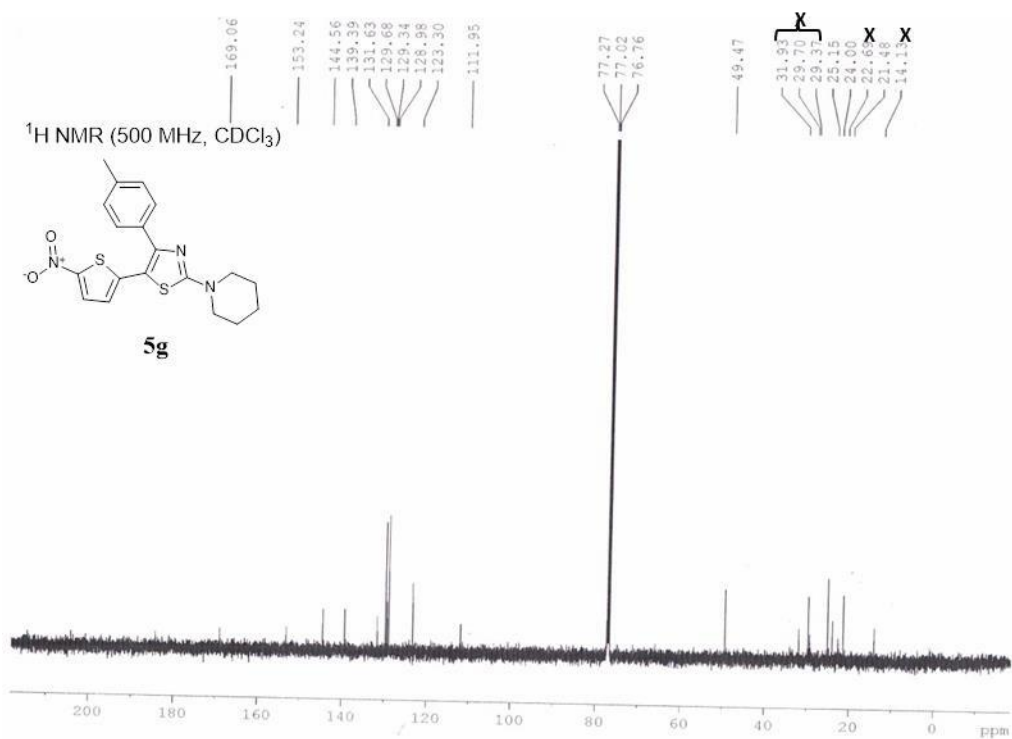

<sup>13</sup>C NMR spectrum of **5g**

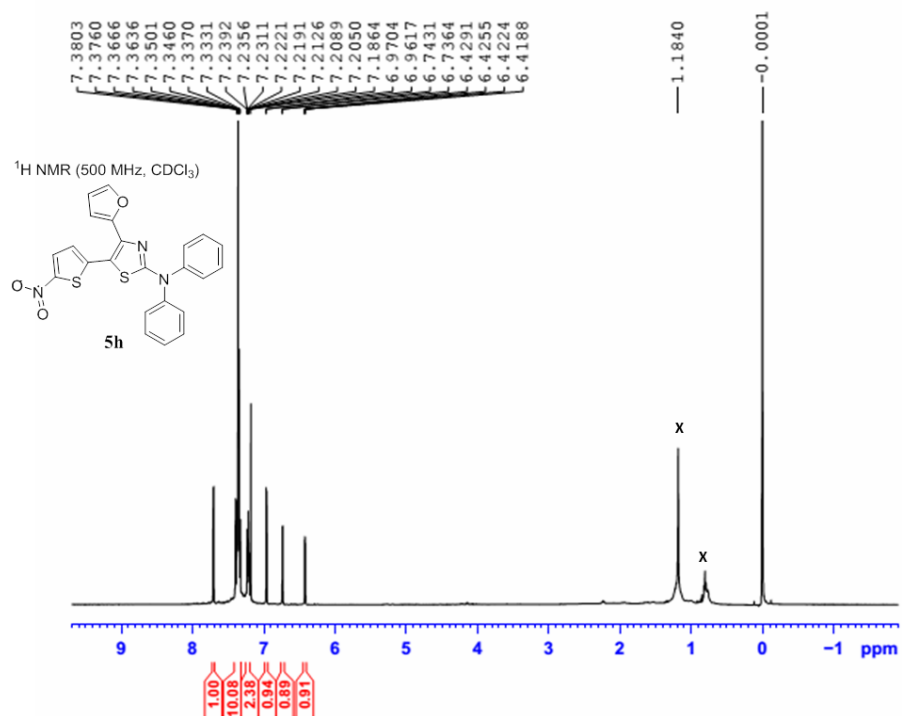

<sup>1</sup>H NMR spectrum of **5h**

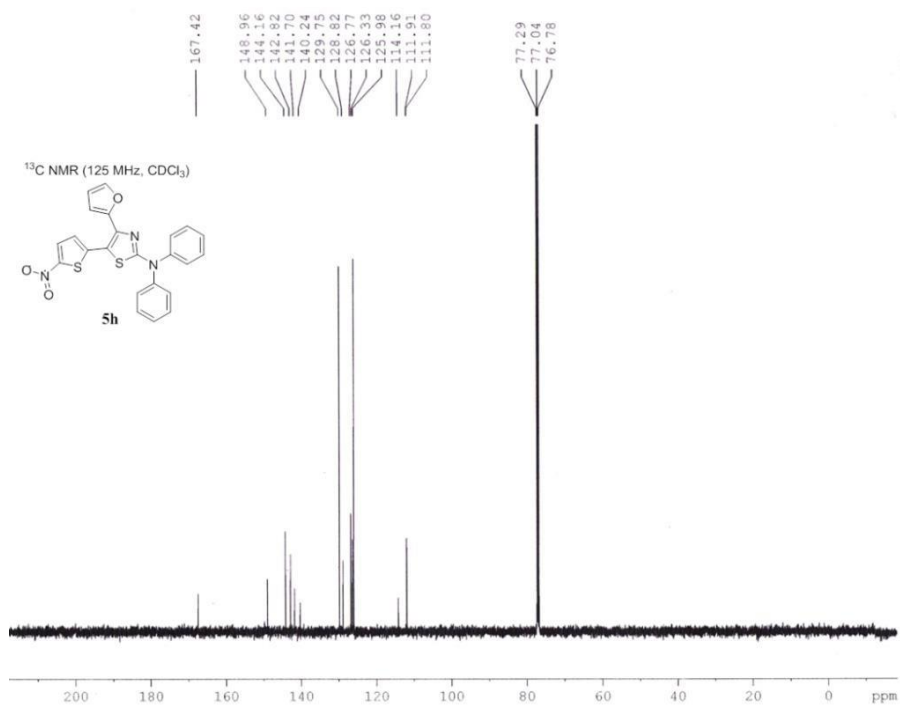

<sup>13</sup>C NMR spectrum of **5h**

## Computational Details

In order to better understand the observed properties, we performed DFT and TD-DFT calculations with Gaussian 09 package.<sup>1</sup> Solvent effects were taken in to consideration using polarizable continuum model. Geometry of the selected molecules were optimized using PBE0/6-31G(d,p) level and subsequent vibrational frequency calculations confirmed that the molecules were minimum in the potential energy surface. For predicting the absorption spectrum, TD-DFT calculations were performed using the same level of theory. The maximum absorption was more precisely described with TD-PBE0 compared to other functionals (results will be reported elsewhere). The frontier molecular orbital analysis confirmed the intramolecular charge transfer. The HOMO of the molecule is delocalized on whole of the molecule and LUMO is predominantly localized on the nitro acceptor suggesting an ICT from donor to acceptor.

**Table 1.** HOMO-LUMO energy and TD-DFT predicted absorption wavelength of compounds 5i-z

| Sl. No | Compound  | HOMO (eV) | LUMO (eV) | Band gap (eV) | Excitation energy (nm) |        |
|--------|-----------|-----------|-----------|---------------|------------------------|--------|
|        |           |           |           |               | Gas                    | THF    |
| 1      | <b>5i</b> | -5.95     | -2.56     | 3.39          | 435.47                 | 467.44 |
| 2      | <b>5j</b> | -6.04     | -2.65     | 3.39          | 436.45                 | 462.18 |
| 3      | <b>5k</b> | -5.89     | -2.53     | 3.36          | 439.90                 | 468.02 |
| 4      | <b>5l</b> | -5.38     | -2.39     | 2.99          | 510.61                 | 567.07 |
| 5      | <b>5m</b> | -5.16     | -2.11     | 3.05          | 496.85                 | 553.02 |
| 6      | <b>5n</b> | -5.18     | -2.24     | 2.94          | 514.96                 | 554.99 |
| 7      | <b>5o</b> | -5.63     | -2.34     | 3.29          | 455.19                 | 494.49 |
| 8      | <b>5p</b> | -5.27     | -2.26     | 3.01          | 488.29                 | 530.34 |
| 9      | <b>5q</b> | -6.24     | -2.87     | 3.37          | 439.14                 | 464.12 |
| 10     | <b>5r</b> | -5.95     | -2.59     | 3.36          | 435.96                 | 463.64 |
| 11     | <b>5s</b> | -6.01     | -2.6      | 3.41          | 433.94                 | 459.33 |
| 12     | <b>5t</b> | -5.61     | -2.37     | 3.24          | 455.98                 | 501.80 |
| 13     | <b>5u</b> | -5.74     | -2.4      | 3.34          | 447.23                 | 482.07 |
| 14     | <b>5v</b> | -5.66     | -2.37     | 3.29          | 445.52                 | 479.88 |
| 15     | <b>5w</b> | -5.57     | -2.49     | 3.08          | 492.56                 | 522.35 |
| 16     | <b>5x</b> | -5.56     | -2.28     | 3.28          | 457.61                 | 497.88 |
| 17     | <b>5y</b> | -5.74     | -2.45     | 3.29          | 490.46                 | 497.09 |
| 18     | <b>5z</b> | -5.20     | -2.19     | 3.01          | 501.43                 | 557.86 |

**Table 2.** HOMO and LUMO of **5q-z**

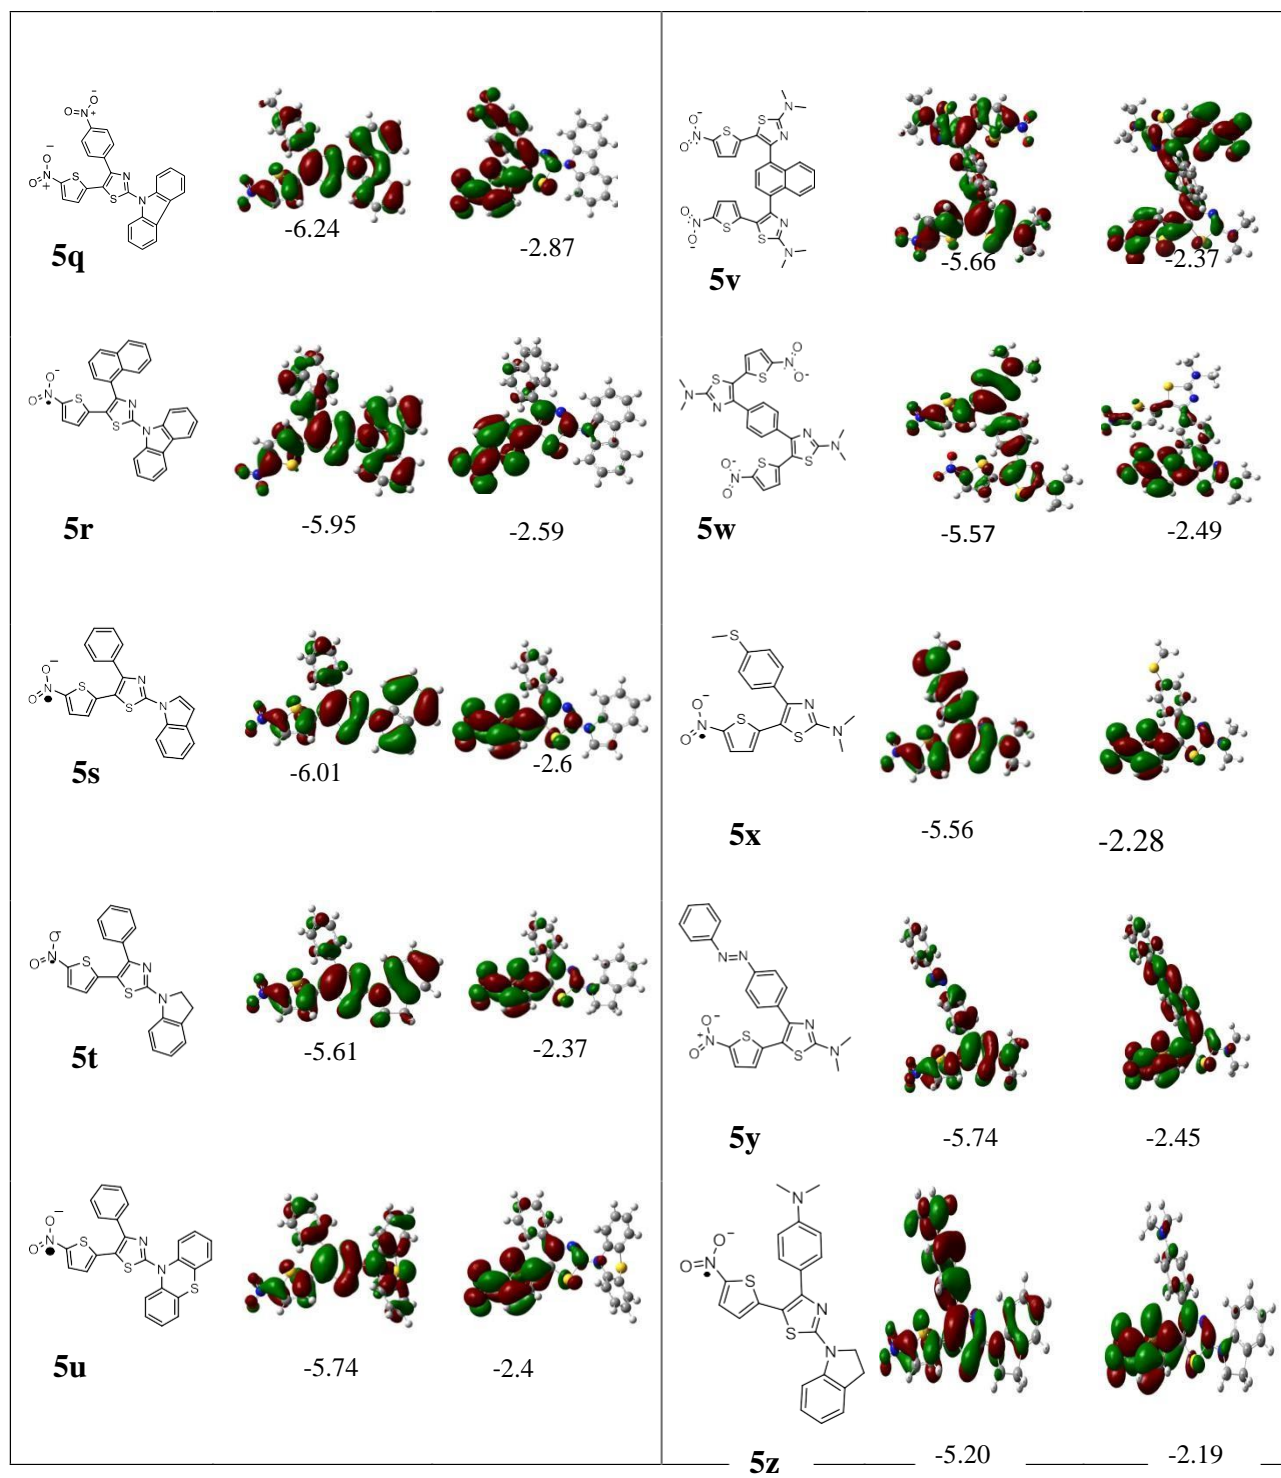

# Coordinates of **5i**

| -----  |        |        |                         |           |           |  |
|--------|--------|--------|-------------------------|-----------|-----------|--|
| Center | Atomic | Atomic | Coordinates (Angstroms) |           |           |  |
| Number | Number | Type   | X                       | Y         | Z         |  |
| -----  |        |        |                         |           |           |  |
| 1      | 16     | 0      | -3.689706               | -0.273462 | -0.731792 |  |
| 2      | 6      | 0      | -4.745315               | -1.578572 | -0.346848 |  |
| 3      | 6      | 0      | -4.166778               | -2.548298 | 0.427671  |  |
| 4      | 6      | 0      | -2.829418               | -2.227291 | 0.727960  |  |
| 5      | 6      | 0      | -2.419900               | -1.020099 | 0.186567  |  |
| 6      | 6      | 0      | -1.089377               | -0.450630 | 0.249730  |  |
| 7      | 16     | 0      | 0.282167                | -1.520116 | 0.109849  |  |
| 8      | 6      | 0      | 1.341374                | -0.129791 | 0.197683  |  |
| 9      | 7      | 0      | 0.716529                | 1.009024  | 0.297933  |  |
| 10     | 6      | 0      | -0.641785               | 0.851452  | 0.339331  |  |
| 11     | 7      | 0      | -6.093673               | -1.561483 | -0.810290 |  |
| 12     | 8      | 0      | -6.438909               | -0.594948 | -1.480517 |  |
| 13     | 8      | 0      | -6.804065               | -2.510366 | -0.510525 |  |
| 14     | 7      | 0      | 2.711129                | -0.226309 | 0.109356  |  |
| 15     | 6      | 0      | -1.470602               | 2.059129  | 0.510107  |  |
| 16     | 6      | 0      | -1.155293               | 3.217405  | -0.209230 |  |
| 17     | 6      | 0      | -1.913069               | 4.371153  | -0.050418 |  |
| 18     | 6      | 0      | -2.986498               | 4.386403  | 0.836865  |  |
| 19     | 6      | 0      | -3.295128               | 3.243360  | 1.569751  |  |
| 20     | 6      | 0      | -2.541648               | 2.086486  | 1.410046  |  |

|    |   |   |           |           |           |
|----|---|---|-----------|-----------|-----------|
| 21 | 6 | 0 | 3.495885  | -1.389846 | 0.222660  |
| 22 | 6 | 0 | 4.833256  | -1.060423 | -0.079455 |
| 23 | 6 | 0 | 4.873704  | 0.354030  | -0.366797 |
| 24 | 6 | 0 | 3.563246  | 0.850374  | -0.229779 |
| 25 | 6 | 0 | 5.913864  | 1.212354  | -0.718958 |
| 26 | 6 | 0 | 5.632705  | 2.555337  | -0.927356 |
| 27 | 6 | 0 | 4.327216  | 3.034999  | -0.780801 |
| 28 | 6 | 0 | 3.273146  | 2.198094  | -0.428839 |
| 29 | 6 | 0 | 3.147412  | -2.685313 | 0.599432  |
| 30 | 6 | 0 | 4.152198  | -3.647926 | 0.633228  |
| 31 | 6 | 0 | 5.475261  | -3.337022 | 0.310366  |
| 32 | 6 | 0 | 5.823194  | -2.039294 | -0.039847 |
| 33 | 1 | 0 | -4.703026 | -3.427557 | 0.760456  |
| 34 | 1 | 0 | -2.179422 | -2.843575 | 1.338575  |
| 35 | 1 | 0 | -0.316471 | 3.199592  | -0.898263 |
| 36 | 1 | 0 | -1.665067 | 5.261471  | -0.620714 |
| 37 | 1 | 0 | -3.577170 | 5.289044  | 0.961972  |
| 38 | 1 | 0 | -4.120952 | 3.254229  | 2.274720  |
| 39 | 1 | 0 | -2.770665 | 1.202652  | 1.997935  |
| 40 | 1 | 0 | 6.925892  | 0.833193  | -0.826635 |
| 41 | 1 | 0 | 6.430382  | 3.239392  | -1.200027 |
| 42 | 1 | 0 | 4.125544  | 4.090494  | -0.937496 |
| 43 | 1 | 0 | 2.269014  | 2.573532  | -0.292936 |
| 44 | 1 | 0 | 2.140916  | -2.958970 | 0.889170  |
| 45 | 1 | 0 | 3.894537  | -4.661366 | 0.925089  |

|    |   |   |          |           |           |
|----|---|---|----------|-----------|-----------|
| 46 | 1 | 0 | 6.234363 | -4.112098 | 0.344369  |
| 47 | 1 | 0 | 6.852743 | -1.785303 | -0.274195 |

-----

E(RPBE1PBE) = -2070.97108191 a.u.

Coordinates of **5j**

-----

| Center | Atomic | Atomic | Coordinates (Angstroms) |           |           |
|--------|--------|--------|-------------------------|-----------|-----------|
| Number | Number | Type   | X                       | Y         | Z         |
| -----  |        |        |                         |           |           |
| 1      | 16     | 0      | -2.617845               | 2.106782  | 0.859173  |
| 2      | 6      | 0      | -3.241533               | 3.618885  | 0.322101  |
| 3      | 6      | 0      | -2.448984               | 4.248984  | -0.599323 |
| 4      | 6      | 0      | -1.303185               | 3.483913  | -0.891205 |
| 5      | 6      | 0      | -1.251255               | 2.287893  | -0.196106 |
| 6      | 6      | 0      | -0.175088               | 1.317158  | -0.218893 |
| 7      | 16     | 0      | 1.469964                | 1.895994  | -0.197705 |
| 8      | 6      | 0      | 2.026966                | 0.236723  | -0.162343 |
| 9      | 7      | 0      | 1.066729                | -0.644337 | -0.146732 |
| 10     | 6      | 0      | -0.170254               | -0.061735 | -0.189048 |
| 11     | 7      | 0      | -4.489990               | 4.091406  | 0.826395  |
| 12     | 8      | 0      | -5.066675               | 3.377231  | 1.638131  |
| 13     | 8      | 0      | -4.888979               | 5.171603  | 0.416727  |
| 14     | 7      | 0      | 3.357645                | -0.105682 | -0.105700 |
| 15     | 6      | 0      | -1.345128               | -0.949796 | -0.237759 |

|    |   |   |           |           |           |
|----|---|---|-----------|-----------|-----------|
| 16 | 6 | 0 | -1.364813 | -2.110322 | 0.543766  |
| 17 | 6 | 0 | -2.449051 | -2.976520 | 0.504635  |
| 18 | 6 | 0 | -3.520005 | -2.686098 | -0.334285 |
| 19 | 6 | 0 | -3.515972 | -1.548724 | -1.134723 |
| 20 | 6 | 0 | -2.427954 | -0.687266 | -1.083804 |
| 21 | 6 | 0 | 4.468657  | 0.738671  | -0.300965 |
| 22 | 6 | 0 | 5.641007  | 0.011003  | -0.011150 |
| 23 | 6 | 0 | 5.239005  | -1.326890 | 0.353386  |
| 24 | 6 | 0 | 3.834607  | -1.382944 | 0.274226  |
| 25 | 6 | 0 | 5.965610  | -2.455550 | 0.727817  |
| 26 | 6 | 0 | 5.280983  | -3.627824 | 1.015829  |
| 27 | 6 | 0 | 3.886264  | -3.671189 | 0.925343  |
| 28 | 6 | 0 | 3.139826  | -2.557573 | 0.553148  |
| 29 | 6 | 0 | 4.540350  | 2.060054  | -0.737816 |
| 30 | 6 | 0 | 5.798696  | 2.645463  | -0.845500 |
| 31 | 6 | 0 | 6.963742  | 1.939680  | -0.537022 |
| 32 | 6 | 0 | 6.890144  | 0.615660  | -0.125535 |
| 33 | 1 | 0 | -2.708195 | 5.204301  | -1.037025 |
| 34 | 1 | 0 | -0.540341 | 3.778800  | -1.602722 |
| 35 | 1 | 0 | -0.522281 | -2.326926 | 1.192865  |
| 36 | 1 | 0 | -2.466801 | -3.870254 | 1.118453  |
| 37 | 1 | 0 | -4.351082 | -1.346278 | -1.795908 |
| 38 | 1 | 0 | -2.412193 | 0.189141  | -1.724255 |
| 39 | 1 | 0 | 7.049059  | -2.414837 | 0.790773  |
| 40 | 1 | 0 | 5.829884  | -4.517943 | 1.307214  |

|    |    |   |           |           |           |
|----|----|---|-----------|-----------|-----------|
| 41 | 1  | 0 | 3.365624  | -4.598790 | 1.143865  |
| 42 | 1  | 0 | 2.064040  | -2.598661 | 0.462937  |
| 43 | 1  | 0 | 3.666447  | 2.633258  | -1.019276 |
| 44 | 1  | 0 | 5.867820  | 3.674375  | -1.184814 |
| 45 | 1  | 0 | 7.929314  | 2.426664  | -0.629793 |
| 46 | 1  | 0 | 7.791883  | 0.053864  | 0.099348  |
| 47 | 35 | 0 | -4.996239 | -3.859469 | -0.395725 |

-----

E(RPBE1PBE)= -4641.7494261 a.u.

Coordinates of **5k**

-----

| Center | Atomic | Atomic | Coordinates (Angstroms) |           |           |
|--------|--------|--------|-------------------------|-----------|-----------|
| Number | Number | Type   | X                       | Y         | Z         |
| 1      | 16     | 0      | -3.511214               | -0.757691 | -0.758158 |
| 2      | 6      | 0      | -4.460676               | -2.135357 | -0.349562 |
| 3      | 6      | 0      | -3.810170               | -3.039001 | 0.447591  |
| 4      | 6      | 0      | -2.504629               | -2.605618 | 0.745462  |
| 5      | 6      | 0      | -2.189615               | -1.380997 | 0.179679  |
| 6      | 6      | 0      | -0.908402               | -0.708101 | 0.234046  |
| 7      | 16     | 0      | 0.542553                | -1.673505 | 0.142957  |
| 8      | 6      | 0      | 1.491002                | -0.203674 | 0.185850  |
| 9      | 7      | 0      | 0.780074                | 0.886496  | 0.240874  |
| 10     | 6      | 0      | -0.563093               | 0.627457  | 0.279482  |

|    |   |   |           |           |           |
|----|---|---|-----------|-----------|-----------|
| 11 | 7 | 0 | -5.803839 | -2.235734 | -0.816029 |
| 12 | 8 | 0 | -6.223497 | -1.313435 | -1.506205 |
| 13 | 8 | 0 | -6.437246 | -3.232579 | -0.499122 |
| 14 | 7 | 0 | 2.865188  | -0.197487 | 0.110492  |
| 15 | 6 | 0 | -1.482633 | 1.772264  | 0.399357  |
| 16 | 6 | 0 | -1.248277 | 2.930592  | -0.348830 |
| 17 | 6 | 0 | -2.093640 | 4.025976  | -0.235900 |
| 18 | 6 | 0 | -3.190073 | 4.007522  | 0.630768  |
| 19 | 6 | 0 | -3.404295 | 2.855701  | 1.393604  |
| 20 | 6 | 0 | -2.566626 | 1.754356  | 1.283445  |
| 21 | 6 | 0 | 3.735550  | -1.293766 | 0.262332  |
| 22 | 6 | 0 | 5.046708  | -0.871208 | -0.039017 |
| 23 | 6 | 0 | 4.981513  | 0.533558  | -0.366238 |
| 24 | 6 | 0 | 3.635649  | 0.931492  | -0.252961 |
| 25 | 6 | 0 | 5.956499  | 1.458544  | -0.735550 |
| 26 | 6 | 0 | 5.576112  | 2.769819  | -0.984348 |
| 27 | 6 | 0 | 4.236564  | 3.152060  | -0.860500 |
| 28 | 6 | 0 | 3.246010  | 2.247234  | -0.492391 |
| 29 | 6 | 0 | 3.483830  | -2.601910 | 0.671509  |
| 30 | 6 | 0 | 4.558964  | -3.483231 | 0.739166  |
| 31 | 6 | 0 | 5.857452  | -3.080454 | 0.418134  |
| 32 | 6 | 0 | 6.108270  | -1.769671 | 0.035074  |
| 33 | 1 | 0 | -4.276171 | -3.951037 | 0.797427  |
| 34 | 1 | 0 | -1.810659 | -3.154712 | 1.371601  |
| 35 | 1 | 0 | -0.399224 | 2.961705  | -1.024894 |

|    |   |   |           |           |           |
|----|---|---|-----------|-----------|-----------|
| 36 | 1 | 0 | -1.899141 | 4.914846  | -0.830946 |
| 37 | 1 | 0 | -4.236107 | 2.825183  | 2.092827  |
| 38 | 1 | 0 | -2.739797 | 0.879746  | 1.903513  |
| 39 | 1 | 0 | 6.995356  | 1.154706  | -0.825032 |
| 40 | 1 | 0 | 6.321844  | 3.504833  | -1.271061 |
| 41 | 1 | 0 | 3.956291  | 4.184213  | -1.048766 |
| 42 | 1 | 0 | 2.214960  | 2.548767  | -0.375177 |
| 43 | 1 | 0 | 2.498675  | -2.944782 | 0.960745  |
| 44 | 1 | 0 | 4.376726  | -4.505333 | 1.056559  |
| 45 | 1 | 0 | 6.673315  | -3.793749 | 0.479216  |
| 46 | 1 | 0 | 7.117516  | -1.443731 | -0.198502 |
| 47 | 6 | 0 | -4.121883 | 5.181337  | 0.727463  |
| 48 | 1 | 0 | -3.620433 | 6.114561  | 0.457124  |
| 49 | 1 | 0 | -4.974823 | 5.059068  | 0.049333  |
| 50 | 1 | 0 | -4.524423 | 5.290487  | 1.738525  |

-----  
E(RPBE1PBE) = -2110.2435252 a.u.

Coordinates of **5l**

| Center | Atomic | Atomic | Coordinates (Angstroms) |           |           |
|--------|--------|--------|-------------------------|-----------|-----------|
| Number | Number | Type   | X                       | Y         | Z         |
| -----  |        |        |                         |           |           |
| 1      | 16     | 0      | -2.997347               | -1.620988 | -0.804940 |
| 2      | 6      | 0      | -3.672561               | -3.169264 | -0.460827 |

|    |    |   |           |           |           |
|----|----|---|-----------|-----------|-----------|
| 3  | 6  | 0 | -2.862810 | -3.967958 | 0.302492  |
| 4  | 6  | 0 | -1.660818 | -3.312509 | 0.625010  |
| 5  | 6  | 0 | -1.577464 | -2.027244 | 0.111187  |
| 6  | 6  | 0 | -0.437229 | -1.141427 | 0.191378  |
| 7  | 16 | 0 | 1.161910  | -1.842921 | 0.154233  |
| 8  | 6  | 0 | 1.837099  | -0.229718 | 0.175175  |
| 9  | 7  | 0 | 0.950538  | 0.722887  | 0.189684  |
| 10 | 6  | 0 | -0.331187 | 0.237484  | 0.214805  |
| 11 | 7  | 0 | -4.975380 | -3.495387 | -0.932058 |
| 12 | 8  | 0 | -5.563761 | -2.638037 | -1.583048 |
| 13 | 8  | 0 | -5.413959 | -4.604712 | -0.659214 |
| 14 | 7  | 0 | 3.193034  | 0.007721  | 0.115989  |
| 15 | 6  | 0 | -1.434311 | 1.200031  | 0.310237  |
| 16 | 6  | 0 | -1.398869 | 2.394254  | -0.419646 |
| 17 | 6  | 0 | -2.420922 | 3.322998  | -0.339830 |
| 18 | 6  | 0 | -3.538076 | 3.102519  | 0.495520  |
| 19 | 6  | 0 | -3.553052 | 1.914994  | 1.259538  |
| 20 | 6  | 0 | -2.525502 | 0.994210  | 1.162396  |
| 21 | 6  | 0 | 4.230685  | -0.898883 | 0.398684  |
| 22 | 6  | 0 | 5.460435  | -0.291350 | 0.070565  |
| 23 | 6  | 0 | 5.167175  | 1.038122  | -0.410678 |
| 24 | 6  | 0 | 3.769910  | 1.206328  | -0.357786 |
| 25 | 6  | 0 | 5.978759  | 2.074503  | -0.869539 |
| 26 | 6  | 0 | 5.385471  | 3.264090  | -1.267949 |
| 27 | 6  | 0 | 3.996384  | 3.417654  | -1.204210 |

|    |   |   |           |           |           |
|----|---|---|-----------|-----------|-----------|
| 28 | 6 | 0 | 3.166272  | 2.399154  | -0.748081 |
| 29 | 6 | 0 | 4.188847  | -2.176978 | 0.952271  |
| 30 | 6 | 0 | 5.394393  | -2.847216 | 1.136260  |
| 31 | 6 | 0 | 6.616466  | -2.264914 | 0.789408  |
| 32 | 6 | 0 | 6.655538  | -0.981102 | 0.262327  |
| 33 | 1 | 0 | -3.150063 | -4.964204 | 0.612973  |
| 34 | 1 | 0 | -0.875799 | -3.750272 | 1.231099  |
| 35 | 1 | 0 | -0.552941 | 2.588659  | -1.072278 |
| 36 | 1 | 0 | -2.351251 | 4.227190  | -0.932730 |
| 37 | 1 | 0 | -4.367521 | 1.714591  | 1.945203  |
| 38 | 1 | 0 | -2.560731 | 0.102214  | 1.781107  |
| 39 | 1 | 0 | 7.056762  | 1.949405  | -0.912968 |
| 40 | 1 | 0 | 6.001776  | 4.082978  | -1.626030 |
| 41 | 1 | 0 | 3.548885  | 4.358517  | -1.510692 |
| 42 | 1 | 0 | 2.095384  | 2.525893  | -0.673653 |
| 43 | 1 | 0 | 3.263605  | -2.645679 | 1.263188  |
| 44 | 1 | 0 | 5.377707  | -3.843753 | 1.566830  |
| 45 | 1 | 0 | 7.538599  | -2.816318 | 0.943864  |
| 46 | 1 | 0 | 7.602898  | -0.514585 | 0.008679  |
| 47 | 7 | 0 | -4.564415 | 4.009605  | 0.568840  |
| 48 | 6 | 0 | -5.669696 | 3.776007  | 1.466401  |
| 49 | 1 | 0 | -6.398431 | 4.579518  | 1.355470  |
| 50 | 1 | 0 | -6.179198 | 2.830867  | 1.239601  |
| 51 | 1 | 0 | -5.354257 | 3.748468  | 2.519277  |
| 52 | 6 | 0 | -4.483961 | 5.250576  | -0.162633 |

|    |   |   |           |          |           |
|----|---|---|-----------|----------|-----------|
| 53 | 1 | 0 | -5.390295 | 5.830514 | 0.013841  |
| 54 | 1 | 0 | -3.625000 | 5.861924 | 0.148566  |
| 55 | 1 | 0 | -4.403656 | 5.078674 | -1.243959 |

-----

E(RPBE1PBE) = -2204.7899854 a.u.

Coordinates of **5m**

-----

| Center | Atomic | Atomic | Coordinates (Angstroms) |           |           |
|--------|--------|--------|-------------------------|-----------|-----------|
| Number | Number | Type   | X                       | Y         | Z         |
| 1      | 6      | 0      | 0.834792                | 3.576888  | -0.113740 |
| 2      | 6      | 0      | -0.231219               | 3.988454  | 0.642870  |
| 3      | 1      | 0      | -0.323553               | 4.999528  | 1.018035  |
| 4      | 6      | 0      | -1.133703               | 2.935663  | 0.868374  |
| 5      | 1      | 0      | -2.040986               | 3.031646  | 1.454033  |
| 6      | 6      | 0      | -0.745073               | 1.734281  | 0.288838  |
| 7      | 6      | 0      | -1.513117               | 0.514964  | 0.262685  |
| 8      | 6      | 0      | -1.158059               | -0.816442 | 0.116605  |
| 9      | 6      | 0      | -3.353964               | -1.093174 | 0.019498  |
| 10     | 6      | 0      | -4.555939               | -3.139129 | -0.396427 |
| 11     | 1      | 0      | -4.657469               | -3.278722 | -1.481527 |
| 12     | 1      | 0      | -5.394354               | -3.632808 | 0.102961  |
| 13     | 1      | 0      | -3.618999               | -3.592252 | -0.074063 |
| 14     | 6      | 0      | -5.771120               | -0.989142 | -0.169983 |

|    |    |   |           |           |           |
|----|----|---|-----------|-----------|-----------|
| 15 | 1  | 0 | -5.786184 | -0.149769 | 0.533183  |
| 16 | 1  | 0 | -6.612054 | -1.641544 | 0.075079  |
| 17 | 1  | 0 | -5.916985 | -0.596504 | -1.186691 |
| 18 | 6  | 0 | 0.201471  | -1.367557 | 0.141431  |
| 19 | 6  | 0 | 1.182303  | -0.903085 | 1.025356  |
| 20 | 1  | 0 | 0.939852  | -0.108706 | 1.724947  |
| 21 | 6  | 0 | 2.454271  | -1.446795 | 1.047459  |
| 22 | 1  | 0 | 3.175697  | -1.052907 | 1.753254  |
| 23 | 6  | 0 | 2.807820  | -2.502469 | 0.179565  |
| 24 | 6  | 0 | 1.809700  | -2.986230 | -0.694065 |
| 25 | 1  | 0 | 2.027865  | -3.798195 | -1.377600 |
| 26 | 6  | 0 | 0.540768  | -2.435424 | -0.698357 |
| 27 | 1  | 0 | -0.213931 | -2.830720 | -1.371258 |
| 28 | 7  | 0 | 1.954299  | 4.364919  | -0.489074 |
| 29 | 7  | 0 | -2.195271 | -1.694770 | -0.048348 |
| 30 | 7  | 0 | -4.545275 | -1.737062 | -0.032403 |
| 31 | 8  | 0 | 1.964892  | 5.539338  | -0.140331 |
| 32 | 8  | 0 | 2.834150  | 3.812346  | -1.143978 |
| 33 | 16 | 0 | 0.758976  | 1.914197  | -0.569703 |
| 34 | 16 | 0 | -3.266713 | 0.643847  | 0.241909  |
| 35 | 6  | 0 | 4.428356  | -4.049891 | -0.777655 |
| 36 | 1  | 0 | 4.360324  | -3.679004 | -1.811063 |
| 37 | 1  | 0 | 5.455555  | -4.370407 | -0.600121 |
| 38 | 1  | 0 | 3.786786  | -4.935705 | -0.692777 |
| 39 | 6  | 0 | 5.102374  | -2.434200 | 0.996391  |

|    |   |   |          |           |          |
|----|---|---|----------|-----------|----------|
| 40 | 1 | 0 | 5.282713 | -1.386047 | 0.717603 |
| 41 | 1 | 0 | 4.851904 | -2.462764 | 2.064281 |
| 42 | 1 | 0 | 6.033952 | -2.985247 | 0.862973 |
| 43 | 7 | 0 | 4.069585 | -3.046274 | 0.194802 |

-----

E(RPBE1PBE) = -1822.9249107 a.u.

# Coordinates of **5n**

-----

| Center | Atomic | Atomic | Coordinates (Angstroms) |           |           |
|--------|--------|--------|-------------------------|-----------|-----------|
| Number | Number | Type   | X                       | Y         | Z         |
| 1      | 6      | 0      | -2.724025               | 3.611578  | -0.249400 |
| 2      | 6      | 0      | -3.790319               | 3.467236  | 0.598662  |
| 3      | 1      | 0      | -4.337829               | 4.312370  | 0.995511  |
| 4      | 6      | 0      | -4.037706               | 2.112306  | 0.881037  |
| 5      | 1      | 0      | -4.824758               | 1.764463  | 1.540477  |
| 6      | 6      | 0      | -3.155325               | 1.244407  | 0.253260  |
| 7      | 6      | 0      | -3.212987               | -0.197459 | 0.272705  |
| 8      | 6      | 0      | -2.242320               | -1.175579 | 0.147934  |
| 9      | 6      | 0      | -4.002047               | -2.519787 | 0.141271  |
| 10     | 6      | 0      | -4.023802               | -4.908012 | -0.175441 |
| 11     | 1      | 0      | -4.062818               | -5.124234 | -1.251881 |
| 12     | 1      | 0      | -4.492542               | -5.733304 | 0.367717  |
| 13     | 1      | 0      | -2.979888               | -4.818879 | 0.123489  |

|    |    |   |           |           |           |
|----|----|---|-----------|-----------|-----------|
| 14 | 6  | 0 | -6.148625 | -3.647135 | 0.044846  |
| 15 | 1  | 0 | -6.566619 | -2.897405 | 0.724842  |
| 16 | 1  | 0 | -6.543346 | -4.620804 | 0.343099  |
| 17 | 1  | 0 | -6.494839 | -3.426443 | -0.975207 |
| 18 | 6  | 0 | -0.786254 | -0.970204 | 0.136470  |
| 19 | 6  | 0 | -0.157087 | -0.044988 | 0.977709  |
| 20 | 1  | 0 | -0.753589 | 0.554357  | 1.658644  |
| 21 | 6  | 0 | 1.218660  | 0.117646  | 0.962641  |
| 22 | 1  | 0 | 1.684624  | 0.846921  | 1.616634  |
| 23 | 6  | 0 | 2.018488  | -0.658904 | 0.111381  |
| 24 | 6  | 0 | 1.395261  | -1.609020 | -0.711903 |
| 25 | 1  | 0 | 2.002170  | -2.230187 | -1.362428 |
| 26 | 6  | 0 | 0.018911  | -1.759867 | -0.694318 |
| 27 | 1  | 0 | -0.452704 | -2.509679 | -1.321523 |
| 28 | 7  | 0 | -2.174917 | 4.838989  | -0.710962 |
| 29 | 7  | 0 | -2.699040 | -2.461774 | 0.046415  |
| 30 | 7  | 0 | -4.710080 | -3.674535 | 0.151017  |
| 31 | 8  | 0 | -2.717093 | 5.874421  | -0.346531 |
| 32 | 8  | 0 | -1.196933 | 4.771063  | -1.449351 |
| 33 | 16 | 0 | -2.011069 | 2.115235  | -0.725930 |
| 34 | 16 | 0 | -4.793549 | -0.963624 | 0.309150  |
| 35 | 7  | 0 | 3.413879  | -0.497661 | 0.090433  |
| 36 | 6  | 0 | 4.114641  | -0.165593 | 1.274456  |
| 37 | 6  | 0 | 3.816576  | -0.810053 | 2.480759  |
| 38 | 6  | 0 | 5.121879  | 0.805383  | 1.249435  |

|    |   |   |          |           |           |
|----|---|---|----------|-----------|-----------|
| 39 | 6 | 0 | 4.506750 | -0.476397 | 3.639957  |
| 40 | 1 | 0 | 3.041556 | -1.569979 | 2.500533  |
| 41 | 6 | 0 | 5.818834 | 1.118847  | 2.410242  |
| 42 | 1 | 0 | 5.351680 | 1.308542  | 0.315536  |
| 43 | 6 | 0 | 5.513621 | 0.485469  | 3.612337  |
| 44 | 1 | 0 | 4.263899 | -0.984424 | 4.568927  |
| 45 | 1 | 0 | 6.597241 | 1.875678  | 2.375509  |
| 46 | 1 | 0 | 6.055175 | 0.738557  | 4.518589  |
| 47 | 6 | 0 | 4.133575 | -0.647189 | -1.118944 |
| 48 | 6 | 0 | 3.643741 | -0.101646 | -2.311251 |
| 49 | 6 | 0 | 5.352326 | -1.335061 | -1.132073 |
| 50 | 6 | 0 | 4.357275 | -0.255235 | -3.493981 |
| 51 | 1 | 0 | 2.704524 | 0.442531  | -2.302070 |
| 52 | 6 | 0 | 6.067171 | -1.466946 | -2.316511 |
| 53 | 1 | 0 | 5.732632 | -1.760209 | -0.208501 |
| 54 | 6 | 0 | 5.573427 | -0.933857 | -3.504535 |
| 55 | 1 | 0 | 3.965015 | 0.174949  | -4.411032 |
| 56 | 1 | 0 | 7.012061 | -2.002862 | -2.311070 |
| 57 | 1 | 0 | 6.131710 | -1.044359 | -4.429054 |

-----  
E(RPBE1PBE) = -2205.9693634

Coordinates of **5o**

| -----  |        |        |                         |           |           |  |
|--------|--------|--------|-------------------------|-----------|-----------|--|
| Center | Atomic | Atomic | Coordinates (Angstroms) |           |           |  |
| Number | Number | Type   | X                       | Y         | Z         |  |
| -----  |        |        |                         |           |           |  |
| 1      | 6      | 0      | -1.700947               | 3.618509  | -0.082858 |  |
| 2      | 6      | 0      | -2.738086               | 3.435650  | 0.793229  |  |
| 3      | 1      | 0      | -3.264878               | 4.261587  | 1.253515  |  |
| 4      | 6      | 0      | -2.985754               | 2.068336  | 1.011411  |  |
| 5      | 1      | 0      | -3.751182               | 1.688965  | 1.678823  |  |
| 6      | 6      | 0      | -2.131413               | 1.232123  | 0.308304  |  |
| 7      | 6      | 0      | -2.193040               | -0.210565 | 0.256550  |  |
| 8      | 6      | 0      | -1.224473               | -1.186277 | 0.108202  |  |
| 9      | 6      | 0      | -2.987137               | -2.523203 | 0.021029  |  |
| 10     | 6      | 0      | -3.011148               | -4.897542 | -0.386639 |  |
| 11     | 1      | 0      | -3.030075               | -5.071929 | -1.471093 |  |
| 12     | 1      | 0      | -3.493820               | -5.740592 | 0.115326  |  |
| 13     | 1      | 0      | -1.972987               | -4.825298 | -0.064031 |  |
| 14     | 6      | 0      | -5.135542               | -3.636459 | -0.154804 |  |
| 15     | 1      | 0      | -5.562369               | -2.913662 | 0.548518  |  |
| 16     | 1      | 0      | -5.538443               | -4.619846 | 0.096736  |  |
| 17     | 1      | 0      | -5.463611               | -3.372716 | -1.170538 |  |
| 18     | 6      | 0      | 0.233850                | -0.988074 | 0.127510  |  |
| 19     | 6      | 0      | 0.848258                | -0.071521 | 0.989516  |  |
| 20     | 1      | 0      | 0.241228                | 0.509509  | 1.676765  |  |
| 21     | 6      | 0      | 2.226010                | 0.071866  | 1.006322  |  |

|    |    |   |           |           |           |
|----|----|---|-----------|-----------|-----------|
| 22 | 1  | 0 | 2.683479  | 0.760560  | 1.709681  |
| 23 | 6  | 0 | 3.042292  | -0.689707 | 0.156077  |
| 24 | 6  | 0 | 2.423786  | -1.622385 | -0.689089 |
| 25 | 1  | 0 | 3.030807  | -2.219582 | -1.364111 |
| 26 | 6  | 0 | 1.046881  | -1.777448 | -0.694513 |
| 27 | 1  | 0 | 0.579831  | -2.508749 | -1.346013 |
| 28 | 7  | 0 | -1.158405 | 4.867264  | -0.496748 |
| 29 | 7  | 0 | -1.682443 | -2.465819 | -0.050045 |
| 30 | 7  | 0 | -3.698928 | -3.674130 | -0.026305 |
| 31 | 8  | 0 | -1.680887 | 5.883475  | -0.058437 |
| 32 | 8  | 0 | -0.206332 | 4.833479  | -1.269633 |
| 33 | 16 | 0 | -1.018765 | 2.146596  | -0.665758 |
| 34 | 16 | 0 | -3.775522 | -0.970693 | 0.234072  |
| 35 | 6  | 0 | 4.492303  | -0.506769 | 0.169445  |
| 36 | 6  | 0 | 5.205793  | 0.619101  | 0.506815  |
| 37 | 16 | 0 | 5.576605  | -1.790597 | -0.273837 |
| 38 | 6  | 0 | 6.610546  | 0.449722  | 0.403259  |
| 39 | 1  | 0 | 4.730125  | 1.551826  | 0.788081  |
| 40 | 6  | 0 | 6.959287  | -0.804322 | -0.011611 |
| 41 | 1  | 0 | 7.332556  | 1.228976  | 0.618406  |
| 42 | 1  | 0 | 7.949630  | -1.206993 | -0.174385 |

-----  
E(RPBE1PBE) = -2240.5977447 a.u.

Coordinates of **5p**

| Center | Atomic | Atomic | Coordinates (Angstroms) |           |           |
|--------|--------|--------|-------------------------|-----------|-----------|
| Number | Number | Type   | X                       | Y         | Z         |
| 1      | 6      | 0      | 3.021089                | 3.635348  | 0.139615  |
| 2      | 6      | 0      | 3.977916                | 3.547458  | -0.837002 |
| 3      | 1      | 0      | 4.379999                | 4.418037  | -1.338862 |
| 4      | 6      | 0      | 4.324075                | 2.208274  | -1.092082 |
| 5      | 1      | 0      | 5.049613                | 1.899509  | -1.836018 |
| 6      | 6      | 0      | 3.621976                | 1.298350  | -0.316027 |
| 7      | 6      | 0      | 3.815449                | -0.133347 | -0.283829 |
| 8      | 6      | 0      | 2.950688                | -1.191134 | -0.069931 |
| 9      | 6      | 0      | 4.826492                | -2.366499 | -0.135366 |
| 10     | 6      | 0      | 5.090888                | -4.731118 | 0.240390  |
| 11     | 1      | 0      | 5.205398                | -4.906341 | 1.318903  |
| 12     | 1      | 0      | 5.607810                | -5.526487 | -0.303598 |
| 13     | 1      | 0      | 4.029231                | -4.750854 | -0.003972 |
| 14     | 6      | 0      | 7.071599                | -3.286317 | -0.142847 |
| 15     | 1      | 0      | 7.375443                | -2.523086 | -0.867069 |
| 16     | 1      | 0      | 7.538401                | -4.228084 | -0.439354 |
| 17     | 1      | 0      | 7.455389                | -3.001708 | 0.847501  |
| 18     | 6      | 0      | 1.483507                | -1.123753 | 0.019811  |
| 19     | 6      | 0      | 0.732648                | -0.255411 | -0.789662 |
| 20     | 1      | 0      | 1.244104                | 0.386745  | -1.500494 |
| 21     | 6      | 0      | -0.647739               | -0.229453 | -0.714500 |

|    |    |   |           |           |           |
|----|----|---|-----------|-----------|-----------|
| 22 | 1  | 0 | -1.235405 | 0.432086  | -1.341176 |
| 23 | 6  | 0 | -1.316682 | -1.081608 | 0.176187  |
| 24 | 6  | 0 | -0.575180 | -1.960961 | 0.971007  |
| 25 | 1  | 0 | -1.114067 | -2.617698 | 1.646976  |
| 26 | 6  | 0 | 0.808134  | -1.989466 | 0.888523  |
| 27 | 1  | 0 | 1.385052  | -2.681656 | 1.492903  |
| 28 | 7  | 0 | 2.417504  | 4.831150  | 0.620505  |
| 29 | 7  | 0 | 3.532308  | -2.425457 | 0.039465  |
| 30 | 7  | 0 | 5.638467  | -3.450604 | -0.158998 |
| 31 | 8  | 0 | 2.799323  | 5.889777  | 0.138979  |
| 32 | 8  | 0 | 1.560670  | 4.713699  | 1.490189  |
| 33 | 16 | 0 | 2.534633  | 2.107680  | 0.772358  |
| 34 | 16 | 0 | 5.455781  | -0.749226 | -0.393188 |
| 35 | 7  | 0 | -2.714322 | -1.141123 | 0.336692  |
| 36 | 7  | 0 | -3.352850 | -0.346228 | -0.402851 |
| 37 | 6  | 0 | -4.740652 | -0.386198 | -0.259543 |
| 38 | 6  | 0 | -5.473610 | 0.487962  | -1.069260 |
| 39 | 6  | 0 | -5.440330 | -1.223243 | 0.624434  |
| 40 | 6  | 0 | -6.853739 | 0.536865  | -1.012676 |
| 41 | 1  | 0 | -4.925529 | 1.134673  | -1.748037 |
| 42 | 6  | 0 | -6.816224 | -1.185215 | 0.691312  |
| 43 | 1  | 0 | -4.872526 | -1.899583 | 1.254672  |
| 44 | 6  | 0 | -7.565872 | -0.303835 | -0.128440 |
| 45 | 1  | 0 | -7.382018 | 1.230883  | -1.655286 |
| 46 | 1  | 0 | -7.323853 | -1.843658 | 1.386694  |

|    |   |   |            |           |           |
|----|---|---|------------|-----------|-----------|
| 47 | 7 | 0 | -8.934001  | -0.271503 | -0.063327 |
| 48 | 6 | 0 | -9.637150  | -1.115088 | 0.873802  |
| 49 | 1 | 0 | -10.709843 | -0.949833 | 0.770051  |
| 50 | 1 | 0 | -9.443088  | -2.179430 | 0.687750  |
| 51 | 1 | 0 | -9.360788  | -0.895678 | 1.914133  |
| 52 | 6 | 0 | -9.672839  | 0.656945  | -0.885220 |
| 53 | 1 | 0 | -10.740015 | 0.529893  | -0.701646 |
| 54 | 1 | 0 | -9.412893  | 1.700891  | -0.662417 |
| 55 | 1 | 0 | -9.493391  | 0.483333  | -1.954310 |

-----

E(RPBE1PBE) = -2163.0567725 a.u.

Coordinates of **5q**

| Center | Atomic | Atomic | Coordinates (Angstroms) |           |           |
|--------|--------|--------|-------------------------|-----------|-----------|
| Number | Number | Type   | X                       | Y         | Z         |
| -----  |        |        |                         |           |           |
| 1      | 16     | 0      | 3.010426                | -1.597791 | 0.944906  |
| 2      | 6      | 0      | 3.836009                | -3.004274 | 0.394970  |
| 3      | 6      | 0      | 3.161035                | -3.700502 | -0.571024 |
| 4      | 6      | 0      | 1.939233                | -3.073837 | -0.888592 |
| 5      | 6      | 0      | 1.717572                | -1.914460 | -0.167786 |
| 6      | 6      | 0      | 0.536338                | -1.072130 | -0.208991 |
| 7      | 16     | 0      | -1.032625               | -1.827283 | -0.160536 |
| 8      | 6      | 0      | -1.769789               | -0.238366 | -0.180655 |

|    |   |   |           |           |           |
|----|---|---|-----------|-----------|-----------|
| 9  | 7 | 0 | -0.913924 | 0.744334  | -0.193953 |
| 10 | 6 | 0 | 0.379060  | 0.298002  | -0.221802 |
| 11 | 7 | 0 | 5.113822  | -3.336938 | 0.940679  |
| 12 | 8 | 0 | 5.565909  | -2.580664 | 1.791418  |
| 13 | 8 | 0 | 5.655399  | -4.348847 | 0.522776  |
| 14 | 7 | 0 | -3.129706 | -0.050869 | -0.120966 |
| 15 | 6 | 0 | 1.449919  | 1.306522  | -0.312808 |
| 16 | 6 | 0 | 1.321418  | 2.510414  | 0.392424  |
| 17 | 6 | 0 | 2.301355  | 3.487327  | 0.307782  |
| 18 | 6 | 0 | 3.406874  | 3.253548  | -0.500410 |
| 19 | 6 | 0 | 3.556297  | 2.078052  | -1.225320 |
| 20 | 6 | 0 | 2.571387  | 1.107003  | -1.128771 |
| 21 | 6 | 0 | -4.133895 | -1.007436 | -0.368718 |
| 22 | 6 | 0 | -5.382300 | -0.442556 | -0.037742 |
| 23 | 6 | 0 | -5.138847 | 0.910098  | 0.406610  |
| 24 | 6 | 0 | -3.751529 | 1.136448  | 0.330911  |
| 25 | 6 | 0 | -5.988770 | 1.922018  | 0.849486  |
| 26 | 6 | 0 | -5.442637 | 3.146338  | 1.208776  |
| 27 | 6 | 0 | -4.063070 | 3.358173  | 1.121554  |
| 28 | 6 | 0 | -3.195557 | 2.363884  | 0.680783  |
| 29 | 6 | 0 | -4.046796 | -2.295096 | -0.892958 |
| 30 | 6 | 0 | -5.226415 | -3.018562 | -1.043377 |
| 31 | 6 | 0 | -6.465858 | -2.478181 | -0.692245 |
| 32 | 6 | 0 | -6.550524 | -1.184318 | -0.195521 |
| 33 | 1 | 0 | 3.551474  | -4.604462 | -1.020382 |

|    |   |   |           |           |           |
|----|---|---|-----------|-----------|-----------|
| 34 | 1 | 0 | 1.243480  | -3.439794 | -1.634957 |
| 35 | 1 | 0 | 0.446599  | 2.668517  | 1.013845  |
| 36 | 1 | 0 | 2.228300  | 4.421889  | 0.850945  |
| 37 | 1 | 0 | 4.427915  | 1.949144  | -1.855569 |
| 38 | 1 | 0 | 2.660970  | 0.193823  | -1.707763 |
| 39 | 1 | 0 | -7.059650 | 1.752091  | 0.910636  |
| 40 | 1 | 0 | -6.089289 | 3.947059  | 1.553810  |
| 41 | 1 | 0 | -3.652998 | 4.325389  | 1.396277  |
| 42 | 1 | 0 | -2.132875 | 2.536761  | 0.589158  |
| 43 | 1 | 0 | -3.109401 | -2.734931 | -1.209557 |
| 44 | 1 | 0 | -5.174713 | -4.023413 | -1.450952 |
| 45 | 1 | 0 | -7.366602 | -3.070080 | -0.820147 |
| 46 | 1 | 0 | -7.512617 | -0.750548 | 0.060261  |
| 47 | 7 | 0 | 4.441013  | 4.283916  | -0.601402 |
| 48 | 8 | 0 | 5.395024  | 4.055444  | -1.327438 |
| 49 | 8 | 0 | 4.282803  | 5.306314  | 0.046307  |

-----  
E(RPBE1PBE) = -2275.2688431 a.u.

Coordinates of **5r**

-----

| Center | Atomic | Atomic | Coordinates (Angstroms) |   |   |
|--------|--------|--------|-------------------------|---|---|
| Number | Number | Type   | X                       | Y | Z |

-----

|   |    |   |           |           |           |
|---|----|---|-----------|-----------|-----------|
| 1 | 16 | 0 | -2.930792 | -2.588274 | -0.551001 |
|---|----|---|-----------|-----------|-----------|

|    |    |   |           |           |           |
|----|----|---|-----------|-----------|-----------|
| 2  | 6  | 0 | -4.551893 | -2.296168 | -0.049510 |
| 3  | 6  | 0 | -4.732710 | -1.064275 | 0.523082  |
| 4  | 6  | 0 | -3.530249 | -0.336318 | 0.574059  |
| 5  | 6  | 0 | -2.455810 | -1.023262 | 0.034298  |
| 6  | 6  | 0 | -1.079603 | -0.586549 | -0.060597 |
| 7  | 16 | 0 | 0.231450  | -1.728376 | 0.084709  |
| 8  | 6  | 0 | 1.361179  | -0.390334 | 0.025400  |
| 9  | 7  | 0 | 0.800375  | 0.778584  | -0.103967 |
| 10 | 6  | 0 | -0.562717 | 0.689183  | -0.176780 |
| 11 | 7  | 0 | -5.545612 | -3.297262 | -0.242261 |
| 12 | 8  | 0 | -5.184117 | -4.346950 | -0.763617 |
| 13 | 8  | 0 | -6.683771 | -3.038727 | 0.122636  |
| 14 | 7  | 0 | 2.723618  | -0.569960 | 0.023802  |
| 15 | 6  | 0 | 3.433024  | -1.697700 | 0.474950  |
| 16 | 6  | 0 | 4.794854  | -1.530551 | 0.150135  |
| 17 | 6  | 0 | 4.926164  | -0.250050 | -0.505976 |
| 18 | 6  | 0 | 3.644158  | 0.329482  | -0.560301 |
| 19 | 6  | 0 | 6.020072  | 0.427836  | -1.042082 |
| 20 | 6  | 0 | 5.817644  | 1.671462  | -1.624125 |
| 21 | 6  | 0 | 4.537218  | 2.233324  | -1.668247 |
| 22 | 6  | 0 | 3.430750  | 1.578391  | -1.137284 |
| 23 | 6  | 0 | 2.991655  | -2.820753 | 1.171145  |
| 24 | 6  | 0 | 3.932633  | -3.791219 | 1.502182  |
| 25 | 6  | 0 | 5.280651  | -3.648877 | 1.162485  |
| 26 | 6  | 0 | 5.719656  | -2.514320 | 0.492706  |

|    |   |   |           |           |           |
|----|---|---|-----------|-----------|-----------|
| 27 | 1 | 0 | -5.693563 | -0.731512 | 0.894241  |
| 28 | 1 | 0 | -3.434876 | 0.653805  | 1.001270  |
| 29 | 1 | 0 | 7.011769  | -0.013435 | -1.004862 |
| 30 | 1 | 0 | 6.658170  | 2.214758  | -2.044788 |
| 31 | 1 | 0 | 4.397806  | 3.210172  | -2.121587 |
| 32 | 1 | 0 | 2.444722  | 2.022430  | -1.152637 |
| 33 | 1 | 0 | 1.961024  | -2.946571 | 1.479766  |
| 34 | 1 | 0 | 3.605493  | -4.673406 | 2.043747  |
| 35 | 1 | 0 | 5.988517  | -4.425586 | 1.434200  |
| 36 | 1 | 0 | 6.769211  | -2.389555 | 0.243203  |
| 37 | 6 | 0 | -1.354602 | 1.913011  | -0.424117 |
| 38 | 6 | 0 | -1.240252 | 3.062407  | 0.419785  |
| 39 | 6 | 0 | -2.205593 | 1.941269  | -1.511323 |
| 40 | 6 | 0 | -0.406087 | 3.100943  | 1.566067  |
| 41 | 6 | 0 | -2.024156 | 4.217102  | 0.109635  |
| 42 | 6 | 0 | -2.971625 | 3.083823  | -1.811700 |
| 43 | 1 | 0 | -2.273834 | 1.066223  | -2.150759 |
| 44 | 6 | 0 | -0.344155 | 4.223747  | 2.354678  |
| 45 | 1 | 0 | 0.199349  | 2.234615  | 1.807333  |
| 46 | 6 | 0 | -1.932955 | 5.359378  | 0.943317  |
| 47 | 6 | 0 | -2.881584 | 4.198738  | -1.017408 |
| 48 | 1 | 0 | -3.625791 | 3.076538  | -2.678138 |
| 49 | 6 | 0 | -1.111829 | 5.366038  | 2.042238  |
| 50 | 1 | 0 | 0.302943  | 4.233671  | 3.226842  |
| 51 | 1 | 0 | -2.531654 | 6.232056  | 0.695194  |

|    |   |   |           |          |           |
|----|---|---|-----------|----------|-----------|
| 52 | 1 | 0 | -3.467463 | 5.086372 | -1.241907 |
| 53 | 1 | 0 | -1.050943 | 6.247151 | 2.674131  |

-----

E(RPBE1PBE) = -2224.4393763 a.u.

Coordinates of **5s**

-----

| Center | Atomic | Atomic | Coordinates (Angstroms) |           |           |
|--------|--------|--------|-------------------------|-----------|-----------|
| Number | Number | Type   | X                       | Y         | Z         |
| -----  |        |        |                         |           |           |
| 1      | 16     | 0      | 0.495180                | -1.960288 | 0.228101  |
| 2      | 6      | 0      | -0.655914               | -0.644588 | 0.269014  |
| 3      | 6      | 0      | 1.769115                | -0.785774 | 0.005306  |
| 4      | 6      | 0      | 0.016943                | 0.554213  | 0.140939  |
| 5      | 6      | 0      | -2.068317               | -0.963157 | 0.335063  |
| 6      | 7      | 0      | 1.374239                | 0.451425  | -0.023975 |
| 7      | 16     | 0      | -3.228558               | -0.178920 | -0.690974 |
| 8      | 6      | 0      | -2.657981               | -1.954123 | 1.100926  |
| 9      | 6      | 0      | -4.044662               | -2.074142 | 0.886464  |
| 10     | 6      | 0      | -4.478718               | -1.173392 | -0.048915 |
| 11     | 7      | 0      | -5.824869               | -0.995831 | -0.487501 |
| 12     | 8      | 0      | -6.026383               | -0.122103 | -1.322823 |
| 13     | 8      | 0      | -6.675245               | -1.728471 | -0.003417 |
| 14     | 1      | 0      | -2.098193               | -2.555354 | 1.808351  |
| 15     | 1      | 0      | -4.711694               | -2.763689 | 1.387435  |

|    |   |   |           |           |           |
|----|---|---|-----------|-----------|-----------|
| 16 | 6 | 0 | 4.208951  | -0.345286 | -0.071515 |
| 17 | 6 | 0 | 3.514540  | -2.495373 | -0.236878 |
| 18 | 6 | 0 | 5.341847  | -1.181594 | -0.189254 |
| 19 | 6 | 0 | 4.315381  | 1.037650  | 0.059883  |
| 20 | 6 | 0 | 4.868207  | -2.534695 | -0.293738 |
| 21 | 1 | 0 | 2.795225  | -3.299527 | -0.299895 |
| 22 | 6 | 0 | 6.618974  | -0.612236 | -0.180620 |
| 23 | 6 | 0 | 5.596904  | 1.573339  | 0.068519  |
| 24 | 1 | 0 | 3.432055  | 1.656584  | 0.145976  |
| 25 | 1 | 0 | 5.468937  | -3.426049 | -0.405309 |
| 26 | 6 | 0 | 6.735218  | 0.763017  | -0.051710 |
| 27 | 1 | 0 | 7.500404  | -1.240214 | -0.271170 |
| 28 | 1 | 0 | 5.716342  | 2.647953  | 0.168944  |
| 29 | 1 | 0 | 7.719540  | 1.221421  | -0.043128 |
| 30 | 7 | 0 | 3.082046  | -1.176515 | -0.100594 |
| 31 | 6 | 0 | -0.567251 | 1.906204  | 0.180880  |
| 32 | 6 | 0 | -0.045427 | 2.901288  | -0.654347 |
| 33 | 6 | 0 | -1.600924 | 2.232713  | 1.066162  |
| 34 | 6 | 0 | -0.568699 | 4.188013  | -0.624989 |
| 35 | 1 | 0 | 0.770668  | 2.650864  | -1.324800 |
| 36 | 6 | 0 | -2.119476 | 3.521638  | 1.094911  |
| 37 | 1 | 0 | -1.984187 | 1.478210  | 1.746491  |
| 38 | 6 | 0 | -1.609467 | 4.500776  | 0.246018  |
| 39 | 1 | 0 | -0.162250 | 4.949652  | -1.283873 |
| 40 | 1 | 0 | -2.918284 | 3.764383  | 1.789220  |

41      1      0    -2.016865   5.507175   0.269418

-----  
E(RPBE1PBE) = -1917.4951687 a.u.

Coordinates of **5t**

-----

| Center | Atomic | Atomic | Coordinates (Angstroms) |           |           |
|--------|--------|--------|-------------------------|-----------|-----------|
| Number | Number | Type   | X                       | Y         | Z         |
| 1      | 16     | 0      | -5.168054               | -2.321288 | 0.063822  |
| 2      | 6      | 0      | -4.023352               | -0.993357 | 0.087616  |
| 3      | 6      | 0      | -3.815476               | -3.433919 | -0.046101 |
| 4      | 6      | 0      | -2.739591               | -1.503679 | 0.033117  |
| 5      | 6      | 0      | -4.538685               | 0.356952  | 0.059573  |
| 6      | 7      | 0      | -2.638512               | -2.864160 | -0.057137 |
| 7      | 16     | 0      | -3.804991               | 1.607671  | -0.898698 |
| 8      | 6      | 0      | -5.700659               | 0.807219  | 0.667661  |
| 9      | 6      | 0      | -5.994439               | 2.154102  | 0.387784  |
| 10     | 6      | 0      | -5.051505               | 2.705397  | -0.438754 |
| 11     | 7      | 0      | -5.015369               | 4.053760  | -0.894093 |
| 12     | 8      | 0      | -4.074422               | 4.374890  | -1.612341 |
| 13     | 8      | 0      | -5.925002               | 4.792903  | -0.542607 |
| 14     | 1      | 0      | -6.302491               | 0.176429  | 1.312056  |
| 15     | 1      | 0      | -6.835164               | 2.717590  | 0.771331  |
| 16     | 6      | 0      | -3.080749               | -5.791891 | -0.042763 |

|    |   |   |           |           |           |
|----|---|---|-----------|-----------|-----------|
| 17 | 6 | 0 | -5.395644 | -5.322165 | -0.073427 |
| 18 | 6 | 0 | -3.724675 | -7.031006 | -0.120003 |
| 19 | 6 | 0 | -1.698116 | -5.692676 | 0.080270  |
| 20 | 6 | 0 | -5.207017 | -6.833502 | -0.290373 |
| 21 | 1 | 0 | -5.862538 | -5.102834 | 0.896325  |
| 22 | 6 | 0 | -2.986389 | -8.200831 | -0.068188 |
| 23 | 6 | 0 | -0.971383 | -6.882314 | 0.132898  |
| 24 | 1 | 0 | -1.220625 | -4.723275 | 0.134399  |
| 25 | 1 | 0 | -5.796761 | -7.417845 | 0.421528  |
| 26 | 6 | 0 | -1.598221 | -8.123623 | 0.062212  |
| 27 | 1 | 0 | -3.482042 | -9.166083 | -0.127443 |
| 28 | 1 | 0 | 0.108815  | -6.831434 | 0.233678  |
| 29 | 1 | 0 | -1.007693 | -9.033372 | 0.107254  |
| 30 | 7 | 0 | -4.040139 | -4.766231 | -0.099533 |
| 31 | 6 | 0 | -1.484716 | -0.730731 | 0.083246  |
| 32 | 6 | 0 | -0.411472 | -1.113807 | -0.729752 |
| 33 | 6 | 0 | -1.322678 | 0.346263  | 0.961845  |
| 34 | 6 | 0 | 0.787508  | -0.412931 | -0.686749 |
| 35 | 1 | 0 | -0.532899 | -1.964026 | -1.393568 |
| 36 | 6 | 0 | -0.120805 | 1.042790  | 1.005240  |
| 37 | 1 | 0 | -2.136777 | 0.624712  | 1.624221  |
| 38 | 6 | 0 | 0.934851  | 0.669456  | 0.177341  |
| 39 | 1 | 0 | 1.610262  | -0.712768 | -1.329229 |
| 40 | 1 | 0 | -0.005783 | 1.874598  | 1.693747  |
| 41 | 1 | 0 | 1.872733  | 1.216003  | 0.211375  |

|    |   |   |           |           |           |
|----|---|---|-----------|-----------|-----------|
| 42 | 1 | 0 | -6.006199 | -4.856803 | -0.854694 |
| 43 | 1 | 0 | -5.526338 | -7.129737 | -1.296089 |

-----

E(RPBE1PBE) = - 1918.7059439 a.u.

Coordinates of **5u**

-----

| Center | Atomic | Atomic | Coordinates (Angstroms) |           |           |
|--------|--------|--------|-------------------------|-----------|-----------|
| Number | Number | Type   | X                       | Y         | Z         |
| -----  |        |        |                         |           |           |
| 1      | 16     | 0      | -3.532779               | -0.199780 | -1.157429 |
| 2      | 6      | 0      | -4.623335               | -1.520149 | -0.970724 |
| 3      | 6      | 0      | -4.134456               | -2.533095 | -0.189067 |
| 4      | 6      | 0      | -2.843273               | -2.232697 | 0.283846  |
| 5      | 6      | 0      | -2.377468               | -0.997005 | -0.134894 |
| 6      | 6      | 0      | -1.065411               | -0.436426 | 0.113715  |
| 7      | 16     | 0      | 0.322894                | -1.500554 | 0.009977  |
| 8      | 6      | 0      | 1.354683                | -0.115071 | 0.301058  |
| 9      | 7      | 0      | 0.722056                | 1.010304  | 0.462401  |
| 10     | 6      | 0      | -0.636213               | 0.849926  | 0.369253  |
| 11     | 7      | 0      | -5.908643               | -1.474444 | -1.583845 |
| 12     | 8      | 0      | -6.180972               | -0.470466 | -2.232864 |
| 13     | 8      | 0      | -6.644446               | -2.438393 | -1.423489 |
| 14     | 6      | 0      | -1.474860               | 2.041395  | 0.590673  |
| 15     | 6      | 0      | -1.024555               | 3.285699  | 0.132850  |

|    |   |   |           |           |           |
|----|---|---|-----------|-----------|-----------|
| 16 | 6 | 0 | -1.786781 | 4.428681  | 0.340249  |
| 17 | 6 | 0 | -3.000210 | 4.347867  | 1.019186  |
| 18 | 6 | 0 | -3.442980 | 3.117928  | 1.499296  |
| 19 | 6 | 0 | -2.685111 | 1.971978  | 1.290438  |
| 20 | 1 | 0 | -4.702680 | -3.428089 | 0.029023  |
| 21 | 1 | 0 | -2.265431 | -2.884153 | 0.929425  |
| 22 | 1 | 0 | -0.070863 | 3.339801  | -0.382477 |
| 23 | 1 | 0 | -1.431684 | 5.386688  | -0.028253 |
| 24 | 1 | 0 | -3.594974 | 5.241908  | 1.181963  |
| 25 | 1 | 0 | -4.378571 | 3.051251  | 2.046594  |
| 26 | 1 | 0 | -3.022422 | 1.019855  | 1.688417  |
| 27 | 6 | 0 | 3.358841  | -1.499006 | 0.249581  |
| 28 | 6 | 0 | 3.553877  | 0.924609  | 0.183545  |
| 29 | 6 | 0 | 4.313024  | -1.741620 | -0.744910 |
| 30 | 6 | 0 | 3.078054  | -2.484722 | 1.196421  |
| 31 | 6 | 0 | 4.546841  | 0.924854  | -0.801965 |
| 32 | 6 | 0 | 3.420529  | 2.019196  | 1.035823  |
| 33 | 6 | 0 | 4.940472  | -2.984598 | -0.816467 |
| 34 | 6 | 0 | 3.685378  | -3.731593 | 1.102585  |
| 35 | 1 | 0 | 2.378506  | -2.268834 | 1.997579  |
| 36 | 6 | 0 | 5.392918  | 2.024104  | -0.939809 |
| 37 | 6 | 0 | 4.249890  | 3.123084  | 0.874841  |
| 38 | 1 | 0 | 2.646371  | 2.008825  | 1.792603  |
| 39 | 6 | 0 | 4.609105  | -3.983947 | 0.091441  |
| 40 | 1 | 0 | 5.688495  | -3.160233 | -1.583455 |

|    |    |   |          |           |           |
|----|----|---|----------|-----------|-----------|
| 41 | 1  | 0 | 3.449246 | -4.499524 | 1.832262  |
| 42 | 1  | 0 | 6.170678 | 2.006798  | -1.697097 |
| 43 | 6  | 0 | 5.232962 | 3.128480  | -0.111227 |
| 44 | 1  | 0 | 4.130083 | 3.979644  | 1.530727  |
| 45 | 1  | 0 | 5.092205 | -4.953615 | 0.022633  |
| 46 | 1  | 0 | 5.885881 | 3.987794  | -0.228872 |
| 47 | 7  | 0 | 2.724630 | -0.228903 | 0.298427  |
| 48 | 16 | 0 | 4.700970 | -0.459389 | -1.897115 |

-----  
E(RPBE1PBE) = -2468.989468 a.u.

Coordinates of **5v**

| Center | Atomic | Atomic | Coordinates (Angstroms) |           |          |
|--------|--------|--------|-------------------------|-----------|----------|
| Number | Number | Type   | X                       | Y         | Z        |
| -----  |        |        |                         |           |          |
| 1      | 6      | 0      | -1.287718               | 0.121037  | 4.072938 |
| 2      | 6      | 0      | -1.810869               | -0.257619 | 2.862075 |
| 3      | 6      | 0      | -1.037881               | -0.175148 | 1.676657 |
| 4      | 6      | 0      | 0.299611                | 0.324849  | 1.758651 |
| 5      | 6      | 0      | 0.808797                | 0.701682  | 3.027303 |
| 6      | 6      | 0      | 0.034698                | 0.602933  | 4.156379 |
| 7      | 1      | 0      | -1.893935               | 0.049260  | 4.971230 |
| 8      | 1      | 0      | -2.823352               | -0.641313 | 2.799833 |
| 9      | 6      | 0      | -1.562334               | -0.561118 | 0.405482 |

|    |    |   |           |           |           |
|----|----|---|-----------|-----------|-----------|
| 10 | 6  | 0 | 1.088765  | 0.405211  | 0.569713  |
| 11 | 1  | 0 | 1.819947  | 1.087715  | 3.089980  |
| 12 | 1  | 0 | 0.441663  | 0.898496  | 5.118954  |
| 13 | 6  | 0 | 0.550510  | 0.006518  | -0.635512 |
| 14 | 6  | 0 | -0.767565 | -0.471555 | -0.717627 |
| 15 | 1  | 0 | 1.153555  | 0.072854  | -1.535601 |
| 16 | 1  | 0 | -1.170066 | -0.771806 | -1.680427 |
| 17 | 6  | 0 | -2.940885 | -1.084552 | 0.270797  |
| 18 | 6  | 0 | -3.953549 | -0.463386 | -0.434114 |
| 19 | 7  | 0 | -3.243417 | -2.286285 | 0.844641  |
| 20 | 16 | 0 | -5.379486 | -1.489265 | -0.387646 |
| 21 | 6  | 0 | -4.031402 | 0.817533  | -1.089286 |
| 22 | 6  | 0 | -4.483066 | -2.631578 | 0.598412  |
| 23 | 16 | 0 | -2.856742 | 2.076716  | -0.842060 |
| 24 | 6  | 0 | -5.054225 | 1.245175  | -1.926679 |
| 25 | 7  | 0 | -5.060871 | -3.763929 | 1.059898  |
| 26 | 6  | 0 | -3.763853 | 3.135151  | -1.860029 |
| 27 | 6  | 0 | -4.902051 | 2.569002  | -2.370107 |
| 28 | 1  | 0 | -5.883957 | 0.608431  | -2.212203 |
| 29 | 6  | 0 | -4.222192 | -4.781112 | 1.663139  |
| 30 | 6  | 0 | -6.378971 | -4.146223 | 0.614061  |
| 31 | 7  | 0 | -3.286629 | 4.447829  | -2.118316 |
| 32 | 1  | 0 | -5.571368 | 3.099949  | -3.034600 |
| 33 | 1  | 0 | -3.929609 | -5.546808 | 0.932252  |
| 34 | 1  | 0 | -3.322218 | -4.308582 | 2.054422  |

|    |    |   |           |           |           |
|----|----|---|-----------|-----------|-----------|
| 35 | 1  | 0 | -4.768573 | -5.262134 | 2.479408  |
| 36 | 1  | 0 | -6.771039 | -4.910749 | 1.288021  |
| 37 | 1  | 0 | -7.059377 | -3.289205 | 0.651657  |
| 38 | 1  | 0 | -6.377106 | -4.549475 | -0.408859 |
| 39 | 8  | 0 | -2.230599 | 4.774126  | -1.584109 |
| 40 | 8  | 0 | -3.960357 | 5.162163  | -2.850001 |
| 41 | 6  | 0 | 2.469713  | 0.937174  | 0.594000  |
| 42 | 6  | 0 | 3.587350  | 0.255600  | 0.150678  |
| 43 | 7  | 0 | 2.670271  | 2.219551  | 1.016246  |
| 44 | 16 | 0 | 4.975946  | 1.324263  | 0.241703  |
| 45 | 6  | 0 | 3.731967  | -1.113736 | -0.278527 |
| 46 | 6  | 0 | 3.926694  | 2.570947  | 0.897177  |
| 47 | 16 | 0 | 4.996517  | -1.566083 | -1.383627 |
| 48 | 6  | 0 | 2.968416  | -2.212246 | 0.089030  |
| 49 | 7  | 0 | 4.412837  | 3.781738  | 1.251017  |
| 50 | 6  | 0 | 4.484536  | -3.210902 | -1.320137 |
| 51 | 6  | 0 | 3.395843  | -3.409004 | -0.510299 |
| 52 | 1  | 0 | 2.141230  | -2.142207 | 0.783644  |
| 53 | 6  | 0 | 3.478176  | 4.848563  | 1.554861  |
| 54 | 6  | 0 | 5.774943  | 4.140260  | 0.936135  |
| 55 | 7  | 0 | 5.187755  | -4.201875 | -2.054300 |
| 56 | 1  | 0 | 2.956423  | -4.386672 | -0.358997 |
| 57 | 1  | 0 | 3.290458  | 5.480122  | 0.676551  |
| 58 | 1  | 0 | 2.534653  | 4.409865  | 1.876476  |
| 59 | 1  | 0 | 3.887384  | 5.469139  | 2.357116  |

|    |   |   |          |           |           |
|----|---|---|----------|-----------|-----------|
| 60 | 1 | 0 | 6.050456 | 5.022161  | 1.518052  |
| 61 | 1 | 0 | 6.458417 | 3.331280  | 1.214415  |
| 62 | 1 | 0 | 5.914466 | 4.367424  | -0.130543 |
| 63 | 8 | 0 | 6.153774 | -3.828599 | -2.713832 |
| 64 | 8 | 0 | 4.782411 | -5.354911 | -1.980813 |

-----

E(RPBE1PBE) = -3299.7045897 a.u.

Coordinates of **5w**

-----

| Center | Atomic | Atomic | Coordinates (Angstroms) |           |           |
|--------|--------|--------|-------------------------|-----------|-----------|
| Number | Number | Type   | X                       | Y         | Z         |
| 1      | 16     | 0      | -5.682414               | -0.062962 | -0.278850 |
| 2      | 6      | 0      | -3.943609               | 0.157337  | -0.173910 |
| 3      | 6      | 0      | -5.423686               | -1.798580 | -0.319668 |
| 4      | 6      | 0      | -3.334627               | -1.084947 | -0.214667 |
| 5      | 6      | 0      | -3.417625               | 1.483946  | 0.035363  |
| 6      | 7      | 0      | -6.463465               | -2.661016 | -0.380347 |
| 7      | 7      | 0      | -4.166458               | -2.164534 | -0.284112 |
| 8      | 6      | 0      | -1.881082               | -1.325775 | -0.194785 |
| 9      | 16     | 0      | -1.975526               | 1.771404  | 0.963273  |
| 10     | 6      | 0      | -3.999412               | 2.680133  | -0.363888 |
| 11     | 6      | 0      | -6.201053               | -4.059098 | -0.658445 |
| 12     | 6      | 0      | -7.809205               | -2.172306 | -0.558541 |

|    |    |   |           |           |           |
|----|----|---|-----------|-----------|-----------|
| 13 | 6  | 0 | -3.284650 | 3.818578  | 0.047024  |
| 14 | 6  | 0 | -2.169367 | 3.472242  | 0.764872  |
| 15 | 7  | 0 | -1.181160 | 4.354921  | 1.273546  |
| 16 | 8  | 0 | -0.208268 | 3.841392  | 1.827566  |
| 17 | 8  | 0 | -1.360746 | 5.555310  | 1.133966  |
| 18 | 6  | 0 | -1.348814 | -2.322646 | 0.630199  |
| 19 | 6  | 0 | 0.021944  | -2.525700 | 0.694000  |
| 20 | 6  | 0 | 0.896430  | -1.738301 | -0.065282 |
| 21 | 6  | 0 | 0.357306  | -0.791250 | -0.944468 |
| 22 | 6  | 0 | 2.348801  | -1.957050 | 0.047197  |
| 23 | 6  | 0 | -1.011956 | -0.588521 | -1.007823 |
| 24 | 6  | 0 | 3.333253  | -0.990090 | -0.030325 |
| 25 | 16 | 0 | 4.901549  | -1.762968 | 0.110242  |
| 26 | 6  | 0 | 3.245604  | 0.453413  | -0.088064 |
| 27 | 6  | 0 | 4.086964  | -3.308888 | 0.265663  |
| 28 | 7  | 0 | 2.781479  | -3.240996 | 0.242347  |
| 29 | 7  | 0 | 4.786671  | -4.464739 | 0.368536  |
| 30 | 6  | 0 | 2.344249  | 1.284367  | 0.555523  |
| 31 | 6  | 0 | 2.558057  | 2.651578  | 0.295524  |
| 32 | 6  | 0 | 3.632180  | 2.838288  | -0.535374 |
| 33 | 16 | 0 | 4.384922  | 1.368636  | -1.030807 |
| 34 | 7  | 0 | 4.155526  | 4.081523  | -0.989118 |
| 35 | 8  | 0 | 3.587012  | 5.101537  | -0.628066 |
| 36 | 8  | 0 | 5.143379  | 4.036405  | -1.717404 |
| 37 | 6  | 0 | 4.066377  | -5.678556 | 0.694356  |

|    |   |   |           |           |           |
|----|---|---|-----------|-----------|-----------|
| 38 | 6 | 0 | 6.210242  | -4.432386 | 0.602732  |
| 39 | 1 | 0 | -4.905105 | 2.718092  | -0.958565 |
| 40 | 1 | 0 | -6.326574 | -4.287085 | -1.725426 |
| 41 | 1 | 0 | -5.176286 | -4.288240 | -0.369592 |
| 42 | 1 | 0 | -6.892259 | -4.679508 | -0.080646 |
| 43 | 1 | 0 | -8.510464 | -2.971609 | -0.310011 |
| 44 | 1 | 0 | -8.005635 | -1.335044 | 0.119156  |
| 45 | 1 | 0 | -8.005059 | -1.843981 | -1.589572 |
| 46 | 1 | 0 | -3.538628 | 4.846395  | -0.178339 |
| 47 | 1 | 0 | -2.023036 | -2.925928 | 1.229982  |
| 48 | 1 | 0 | 0.436959  | -3.291980 | 1.340436  |
| 49 | 1 | 0 | 1.016500  | -0.218726 | -1.588305 |
| 50 | 1 | 0 | -1.418576 | 0.141825  | -1.700773 |
| 51 | 1 | 0 | 1.563139  | 0.910216  | 1.205349  |
| 52 | 1 | 0 | 1.972586  | 3.465726  | 0.707199  |
| 53 | 1 | 0 | 4.583898  | -6.532136 | 0.248112  |
| 54 | 1 | 0 | 3.996048  | -5.834049 | 1.779818  |
| 55 | 1 | 0 | 3.058029  | -5.609234 | 0.287335  |
| 56 | 1 | 0 | 6.624874  | -5.420888 | 0.394133  |
| 57 | 1 | 0 | 6.692092  | -3.721078 | -0.076245 |
| 58 | 1 | 0 | 6.463915  | -4.156536 | 1.636487  |

-----  
E(RPBE1PBE) = -3146.2426091 a.u.

Coordinates of **5x**

| -----  |        |        |                         |           |           |  |
|--------|--------|--------|-------------------------|-----------|-----------|--|
| Center | Atomic | Atomic | Coordinates (Angstroms) |           |           |  |
| Number | Number | Type   | X                       | Y         | Z         |  |
| -----  |        |        |                         |           |           |  |
| 1      | 6      | 0      | 0.003019                | 3.742000  | -0.081226 |  |
| 2      | 6      | 0      | -1.066821               | 3.873153  | 0.764279  |  |
| 3      | 1      | 0      | -1.346407               | 4.820016  | 1.207893  |  |
| 4      | 6      | 0      | -1.703089               | 2.636890  | 0.976878  |  |
| 5      | 1      | 0      | -2.563384               | 2.500051  | 1.622149  |  |
| 6      | 6      | 0      | -1.106308               | 1.583531  | 0.300206  |  |
| 7      | 6      | 0      | -1.578541               | 0.219212  | 0.247433  |  |
| 8      | 6      | 0      | -0.926147               | -0.993964 | 0.126803  |  |
| 9      | 6      | 0      | -2.995590               | -1.769589 | -0.013935 |  |
| 10     | 6      | 0      | -3.686261               | -4.041344 | -0.418817 |  |
| 11     | 1      | 0      | -3.710499               | -4.212076 | -1.503834 |  |
| 12     | 1      | 0      | -4.411382               | -4.705370 | 0.059610  |  |
| 13     | 1      | 0      | -2.685234               | -4.268793 | -0.053608 |  |
| 14     | 6      | 0      | -5.367206               | -2.222906 | -0.253666 |  |
| 15     | 1      | 0      | -5.588599               | -1.401278 | 0.435682  |  |
| 16     | 1      | 0      | -6.042056               | -3.047205 | -0.013431 |  |
| 17     | 1      | 0      | -5.577156               | -1.885895 | -1.279018 |  |
| 18     | 6      | 0      | 0.525796                | -1.222807 | 0.194560  |  |
| 19     | 6      | 0      | 1.351299                | -0.515769 | 1.079275  |  |
| 20     | 1      | 0      | 0.919124                | 0.230161  | 1.739029  |  |
| 21     | 6      | 0      | 2.709459                | -0.773966 | 1.144122  |  |

|    |    |   |           |           |           |
|----|----|---|-----------|-----------|-----------|
| 22 | 1  | 0 | 3.330231  | -0.218601 | 1.841560  |
| 23 | 6  | 0 | 3.288598  | -1.754867 | 0.326381  |
| 24 | 6  | 0 | 2.468216  | -2.478060 | -0.544080 |
| 25 | 1  | 0 | 2.881420  | -3.250089 | -1.183391 |
| 26 | 6  | 0 | 1.104976  | -2.216958 | -0.598578 |
| 27 | 1  | 0 | 0.469236  | -2.791277 | -1.264913 |
| 28 | 7  | 0 | 0.891461  | 4.778519  | -0.482493 |
| 29 | 7  | 0 | -1.727984 | -2.089559 | -0.046912 |
| 30 | 7  | 0 | -4.005958 | -2.669119 | -0.081490 |
| 31 | 8  | 0 | 0.672942  | 5.905791  | -0.058726 |
| 32 | 8  | 0 | 1.811280  | 4.466228  | -1.231663 |
| 33 | 16 | 0 | 0.249459  | 2.130302  | -0.641515 |
| 34 | 16 | 0 | -3.311722 | -0.055176 | 0.178669  |
| 35 | 16 | 0 | 5.028392  | -1.995524 | 0.491360  |
| 36 | 6  | 0 | 5.383280  | -3.305397 | -0.695515 |
| 37 | 1  | 0 | 5.142968  | -2.999783 | -1.716826 |
| 38 | 1  | 0 | 6.458723  | -3.481845 | -0.627880 |
| 39 | 1  | 0 | 4.860466  | -4.231657 | -0.444557 |

-----  
E(RPBE1PBE) = -2126.4115548 a.u.

Coordinates of **5y**

| -----  |        |        |                         |           |           |  |
|--------|--------|--------|-------------------------|-----------|-----------|--|
| Center | Atomic | Atomic | Coordinates (Angstroms) |           |           |  |
| Number | Number | Type   | X                       | Y         | Z         |  |
| -----  |        |        |                         |           |           |  |
| 1      | 6      | 0      | 1.923599                | 3.657437  | 0.094227  |  |
| 2      | 6      | 0      | 2.849094                | 3.576702  | -0.912360 |  |
| 3      | 1      | 0      | 3.208941                | 4.447733  | -1.444609 |  |
| 4      | 6      | 0      | 3.225317                | 2.242135  | -1.152584 |  |
| 5      | 1      | 0      | 3.934183                | 1.938149  | -1.914317 |  |
| 6      | 6      | 0      | 2.575679                | 1.330425  | -0.335545 |  |
| 7      | 6      | 0      | 2.804185                | -0.096626 | -0.281464 |  |
| 8      | 6      | 0      | 1.962842                | -1.170446 | -0.058722 |  |
| 9      | 6      | 0      | 3.863289                | -2.305271 | -0.102516 |  |
| 10     | 6      | 0      | 4.180334                | -4.659599 | 0.298426  |  |
| 11     | 1      | 0      | 4.296288                | -4.822978 | 1.378534  |  |
| 12     | 1      | 0      | 4.716734                | -5.447263 | -0.237716 |  |
| 13     | 1      | 0      | 3.120169                | -4.706186 | 0.051380  |  |
| 14     | 6      | 0      | 6.128824                | -3.172768 | -0.094508 |  |
| 15     | 1      | 0      | 6.416500                | -2.413204 | -0.829163 |  |
| 16     | 1      | 0      | 6.617383                | -4.107662 | -0.377047 |  |
| 17     | 1      | 0      | 6.503951                | -2.865646 | 0.892296  |  |
| 18     | 6      | 0      | 0.493474                | -1.134150 | 0.024308  |  |
| 19     | 6      | 0      | -0.271002               | -0.277529 | -0.785541 |  |
| 20     | 1      | 0      | 0.230254                | 0.377871  | -1.491148 |  |
| 21     | 6      | 0      | -1.651719               | -0.280704 | -0.716006 |  |

|    |    |   |           |           |           |
|----|----|---|-----------|-----------|-----------|
| 22 | 1  | 0 | -2.251052 | 0.370994  | -1.341972 |
| 23 | 6  | 0 | -2.302609 | -1.151384 | 0.168891  |
| 24 | 6  | 0 | -1.549607 | -2.019126 | 0.963902  |
| 25 | 1  | 0 | -2.077952 | -2.689587 | 1.634578  |
| 26 | 6  | 0 | -0.165367 | -2.017857 | 0.887174  |
| 27 | 1  | 0 | 0.424563  | -2.699829 | 1.490212  |
| 28 | 7  | 0 | 1.301462  | 4.846024  | 0.573040  |
| 29 | 7  | 0 | 2.569486  | -2.390659 | 0.067227  |
| 30 | 7  | 0 | 4.699581  | -3.370015 | -0.110154 |
| 31 | 8  | 0 | 1.635968  | 5.904284  | 0.058277  |
| 32 | 8  | 0 | 0.478323  | 4.720493  | 1.473105  |
| 33 | 16 | 0 | 1.504633  | 2.130928  | 0.774547  |
| 34 | 16 | 0 | 4.457355  | -0.676473 | -0.374510 |
| 35 | 7  | 0 | -3.701258 | -1.241484 | 0.323285  |
| 36 | 7  | 0 | -4.355433 | -0.460311 | -0.407972 |
| 37 | 6  | 0 | -5.755536 | -0.546088 | -0.256817 |
| 38 | 6  | 0 | -6.498330 | 0.319606  | -1.063383 |
| 39 | 6  | 0 | -6.409636 | -1.418294 | 0.623956  |
| 40 | 6  | 0 | -7.886658 | 0.319033  | -0.995417 |
| 41 | 1  | 0 | -5.960643 | 0.983147  | -1.733620 |
| 42 | 6  | 0 | -7.794076 | -1.413733 | 0.686590  |
| 43 | 1  | 0 | -5.812073 | -2.080803 | 1.240589  |
| 44 | 6  | 0 | -8.535926 | -0.547469 | -0.120699 |
| 45 | 1  | 0 | -8.461280 | 0.993618  | -1.622943 |
| 46 | 1  | 0 | -8.305339 | -2.087726 | 1.368095  |

47      1      0      -9.620646 -0.550777 -0.064249

-----  
E(RPBE1PBE) = -2029.2366038 a.u.

Coordinates of **5z**

-----

| Center | Atomic | Atomic | Coordinates (Angstroms) |           |           |
|--------|--------|--------|-------------------------|-----------|-----------|
| Number | Number | Type   | X                       | Y         | Z         |
| 1      | 16     | 0      | 1.306062                | -2.346242 | 0.272744  |
| 2      | 6      | 0      | -0.128555               | -1.334029 | 0.276254  |
| 3      | 6      | 0      | 2.275237                | -0.901497 | 0.048011  |
| 4      | 6      | 0      | 0.252890                | -0.008051 | 0.143605  |
| 5      | 6      | 0      | -1.417497               | -1.980497 | 0.284360  |
| 6      | 7      | 0      | 1.595754                | 0.213534  | -0.002243 |
| 7      | 16     | 0      | -2.795913               | -1.335015 | -0.560255 |
| 8      | 6      | 0      | -1.707750               | -3.221674 | 0.836234  |
| 9      | 6      | 0      | -3.024638               | -3.649978 | 0.598808  |
| 10     | 6      | 0      | -3.721386               | -2.728726 | -0.138412 |
| 11     | 7      | 0      | -5.086567               | -2.815613 | -0.520563 |
| 12     | 8      | 0      | -5.550940               | -1.873570 | -1.156627 |
| 13     | 8      | 0      | -5.703900               | -3.822249 | -0.195224 |
| 14     | 1      | 0      | -0.982404               | -3.787294 | 1.410189  |
| 15     | 1      | 0      | -3.469665               | -4.571273 | 0.951837  |

-----

|    |   |   |           |           |           |
|----|---|---|-----------|-----------|-----------|
| 16 | 6 | 0 | 4.550589  | 0.052935  | -0.062689 |
| 17 | 6 | 0 | 4.307255  | -2.293509 | 0.033956  |
| 18 | 6 | 0 | 5.843902  | -0.472540 | -0.151365 |
| 19 | 6 | 0 | 4.321704  | 1.424390  | 0.000289  |
| 20 | 6 | 0 | 5.785373  | -1.973330 | -0.248018 |
| 21 | 1 | 0 | 4.166402  | -2.724837 | 1.034330  |
| 22 | 6 | 0 | 6.937695  | 0.375418  | -0.172228 |
| 23 | 6 | 0 | 5.436542  | 2.262761  | -0.019343 |
| 24 | 1 | 0 | 3.311957  | 1.808059  | 0.064210  |
| 25 | 1 | 0 | 6.447351  | -2.470584 | 0.466555  |
| 26 | 6 | 0 | 6.730315  | 1.754710  | -0.102645 |
| 27 | 1 | 0 | 7.944300  | -0.028337 | -0.240889 |
| 28 | 1 | 0 | 5.284257  | 3.336849  | 0.033945  |
| 29 | 1 | 0 | 7.579543  | 2.430849  | -0.114662 |
| 30 | 7 | 0 | 3.621802  | -1.000980 | -0.041805 |
| 31 | 6 | 0 | -0.633313 | 1.161374  | 0.159814  |
| 32 | 6 | 0 | -0.394521 | 2.235727  | -0.705976 |
| 33 | 6 | 0 | -1.701516 | 1.277155  | 1.056574  |
| 34 | 6 | 0 | -1.206902 | 3.355406  | -0.712078 |
| 35 | 1 | 0 | 0.443073  | 2.177891  | -1.394593 |
| 36 | 6 | 0 | -2.519555 | 2.392761  | 1.068374  |
| 37 | 1 | 0 | -1.887966 | 0.481974  | 1.772437  |
| 38 | 6 | 0 | -2.299454 | 3.464194  | 0.175833  |
| 39 | 1 | 0 | -0.991761 | 4.150680  | -1.415913 |
| 40 | 1 | 0 | -3.331074 | 2.433940  | 1.784883  |

|    |   |   |           |           |           |
|----|---|---|-----------|-----------|-----------|
| 41 | 1 | 0 | 3.878592  | -2.988242 | -0.696151 |
| 42 | 1 | 0 | 6.077276  | -2.310702 | -1.249236 |
| 43 | 7 | 0 | -3.109119 | 4.573962  | 0.180661  |
| 44 | 6 | 0 | -4.297974 | 4.588304  | 0.999512  |
| 45 | 1 | 0 | -4.817106 | 5.537288  | 0.861067  |
| 46 | 1 | 0 | -4.994316 | 3.777223  | 0.741975  |
| 47 | 1 | 0 | -4.052045 | 4.498968  | 2.065003  |
| 48 | 6 | 0 | -2.927593 | 5.596530  | -0.821142 |
| 49 | 1 | 0 | -3.650737 | 6.395391  | -0.653261 |
| 50 | 1 | 0 | -1.925965 | 6.040043  | -0.762566 |
| 51 | 1 | 0 | -3.071551 | 5.215454  | -1.842908 |

---

E(RPBE1PBE) = -2052.5245857 a.u.

## References

1. Frisch, M. J.; Trucks, G. W.; Schlegel, H. B.; Scuseria, G. E.; Robb, M. A.; Cheeseman, J. R.; Scalmani, G.; Barone, V.; Mennucci, B.; Petersson, G. A.; Nakatsuji, H.; Caricato, M.; Li, X.; Hratchian, H. P.; Izmaylov, A. F.; Bloino, J.; Zheng, G.; Sonnenberg, J. L.; Hada, M.; Ehara, M.; Toyota, K.; Fukuda, R.; Hasegawa, J.; Ishida, M.; Nakajima, T.; Honda, Y.; Kitao, O.; Nakai, H.; Vreven, T.; Montgomery Jr., J. A.; Peralta, J. E.; Ogliaro, F.; Bearpark, M. J.; Heyd, J.; Brothers, E. N.; Kudin, K. N.; Staroverov, V. N.; Kobayashi, R.; Normand, J.; Raghavachari, K.; Rendell, A. P.; Burant, J. C.; Iyengar, S. S.; Tomasi, J.; Cossi, M.; Rega, N.; Millam, N. J.; Klene, M.; Knox, J. E.; Cross, J. B.; Bakken, V.; Adamo, C.; Jaramillo, J.; Gomperts, R.; Stratmann, R. E.; Yazyev, O.; Austin, A. J.; Cammi, R.; Pomelli, C.; Ochterski, J. W.; Martin, R. L.; Morokuma, K.; Zakrzewski, V. G.; Voth, G. A.; Salvador, P.; Dannenberg, J. J.; Dapprich, S.; Daniels, A. D.; Farkas, Ö.; Foresman, J. B.; Ortiz, J. V.; Cioslowski, J.; Fox, D. J. *Gaussian 09*, Gaussian, Inc.: Wallingford, CT, USA, 2009.
